# Supplementary material for: Glycosaminoglycan Monosaccharide Blocks Analysis by Quantum Mechanics, Molecular Dynamics, and Nuclear Magnetic Resonance
Source: Hindawi journal article supplement (doi:10.1155/2014/808071), 2014-01-01
Supplement: f1 [file 808071.f1.pdf]

## Supplementary Materials

Supplementary Table 1. Chemical shifts (ppm) calculated by GIAO approach (B3LYP/6-311++G(2d,p)) for GlcNAc

| Atom | GlcNAc                      |        |        |                             |        |        |                             |        |        | M-GlcNAc                    |        |        |                             |        |        |                             |        |        |
|------|-----------------------------|--------|--------|-----------------------------|--------|--------|-----------------------------|--------|--------|-----------------------------|--------|--------|-----------------------------|--------|--------|-----------------------------|--------|--------|
|      | <sup>4</sup> C <sub>1</sub> |        |        | <sup>1</sup> C <sub>4</sub> |        |        | <sup>2</sup> S <sub>0</sub> |        |        | <sup>4</sup> C <sub>1</sub> |        |        | <sup>1</sup> C <sub>4</sub> |        |        | <sup>2</sup> S <sub>0</sub> |        |        |
|      | gg                          | gt     | tg     | gg                          | gt     | tg     | gg                          | gt     | tg     | gg                          | gt     | tg     | gg                          | gt     | tg     | gg                          | gt     | tg     |
| C1   | 107.06                      | 107.00 | 107.14 | 100.30                      | 102.33 | 101.82 | 103.96                      | 105.09 | 108.58 | 108.49                      | 108.40 | 111.77 | 106.59                      | 108.98 | 108.34 | 109.38                      | 111.36 | 113.20 |
| C2   | 64.52                       | 64.30  | 63.63  | 51.89                       | 52.38  | 53.69  | 68.81                       | 67.77  | 71.97  | 55.66                       | 55.75  | 57.56  | 53.06                       | 54.61  | 54.19  | 69.72                       | 69.12  | 64.04  |
| C3   | 82.59                       | 82.51  | 80.38  | 73.95                       | 75.39  | 76.14  | 85.07                       | 85.29  | 76.26  | 85.28                       | 84.97  | 82.35  | 72.08                       | 73.02  | 75.93  | 86.48                       | 85.30  | 81.18  |
| C4   | 76.93                       | 80.69  | 84.26  | 82.57                       | 77.04  | 76.34  | 69.73                       | 72.18  | 79.78  | 76.64                       | 80.61  | 84.01  | 80.11                       | 78.06  | 76.24  | 69.37                       | 72.53  | 77.33  |
| C5   | 84.15                       | 84.15  | 77.33  | 87.19                       | 84.04  | 84.54  | 84.54                       | 86.93  | 85.21  | 84.73                       | 85.22  | 77.14  | 88.75                       | 89.89  | 84.68  | 86.20                       | 86.47  | 83.61  |
| C6   | 65.26                       | 69.17  | 74.21  | 70.45                       | 68.42  | 70.14  | 65.85                       | 72.80  | 74.33  | 66.22                       | 69.16  | 73.99  | 69.23                       | 71.06  | 69.29  | 68.51                       | 71.39  | 74.52  |
| C7   | 183.11                      | 183.04 | 182.75 | 173.81                      | 174.05 | 173.90 | 178.93                      | 179.09 | 180.38 | 175.34                      | 175.64 | 174.58 | 174.90                      | 174.94 | 174.21 | 178.60                      | 178.94 | 176.43 |
| C8   | 23.92                       | 23.96  | 23.99  | 24.29                       | 24.29  | 24.44  | 24.20                       | 24.14  | 24.03  | 24.68                       | 24.64  | 24.60  | 24.42                       | 24.20  | 24.50  | 24.10                       | 24.23  | 24.61  |
| H1   | 4.73                        | 4.65   | 4.67   | 5.52                        | 5.46   | 5.23   | 5.07                        | 5.12   | 5.04   | 4.41                        | 4.48   | 4.17   | 4.76                        | 5.00   | 4.65   | 4.46                        | 4.45   | 4.28   |
| H2   | 3.76                        | 3.78   | 3.74   | 4.55                        | 4.64   | 4.64   | 3.82                        | 3.92   | 3.75   | 4.58                        | 4.53   | 4.48   | 4.27                        | 4.47   | 4.51   | 3.90                        | 3.88   | 4.16   |
| H3   | 3.37                        | 3.36   | 3.69   | 4.02                        | 4.11   | 4.27   | 3.67                        | 3.68   | 3.89   | 3.18                        | 3.21   | 3.50   | 3.92                        | 4.05   | 4.21   | 3.66                        | 3.68   | 3.71   |
| H4   | 3.95                        | 3.17   | 3.74   | 4.30                        | 4.03   | 4.43   | 4.92                        | 4.40   | 4.28   | 4.16                        | 3.19   | 3.80   | 4.20                        | 4.08   | 4.37   | 4.71                        | 4.18   | 4.43   |
| H5   | 3.03                        | 3.29   | 3.64   | 3.89                        | 3.87   | 3.85   | 3.84                        | 3.94   | 4.04   | 3.15                        | 3.34   | 3.62   | 3.67                        | 3.94   | 3.82   | 3.60                        | 3.90   | 3.90   |
| H6   | 3.97                        | 3.84   | 4.09   | 4.20                        | 4.27   | 4.00   | 3.92                        | 4.14   | 4.21   | 4.38                        | 3.88   | 4.10   | 4.03                        | 4.30   | 4.10   | 3.78                        | 4.09   | 4.17   |
| H7   | 4.08                        | 3.99   | 4.41   | 3.93                        | 3.91   | 5.29   | 4.31                        | 3.76   | 4.44   | 4.20                        | 4.07   | 4.39   | 3.54                        | 3.45   | 5.22   | 4.29                        | 3.78   | 4.36   |
| H8   | 5.74                        | 5.67   | 5.78   | 6.74                        | 6.83   | 6.89   | 5.41                        | 5.35   | 5.14   | 4.63                        | 4.64   | 4.51   | 6.84                        | 7.15   | 6.91   | 5.47                        | 5.41   | 5.14   |
| H9   | 1.70                        | 1.69   | 1.70   | 1.52                        | 1.53   | 1.54   | 1.62                        | 1.61   | 1.65   | 1.53                        | 1.54   | 1.49   | 1.54                        | 1.56   | 1.55   | 1.60                        | 1.60   | 1.69   |
| H10  | 2.21                        | 2.22   | 2.21   | 2.07                        | 2.07   | 2.05   | 2.19                        | 2.23   | 2.16   | 2.19                        | 2.20   | 2.08   | 2.06                        | 2.06   | 2.06   | 2.22                        | 2.23   | 2.19   |
| H11  | 2.25                        | 2.23   | 2.21   | 2.09                        | 2.12   | 2.09   | 2.22                        | 2.24   | 2.26   | 2.24                        | 2.24   | 2.20   | 2.13                        | 2.11   | 2.08   | 2.23                        | 2.24   | 2.21   |

Supplementary Table 2. Chemical shifts (ppm) calculated by GIAO approach (B3LYP/6-311++G(2d,p)) for GlcNAc(4S)

| Atom | GlcNAc(4S) |        |        |         |        |        |         |        |        | M-GlcNAc(4S) |        |        |         |        |        |         |        |        |
|------|------------|--------|--------|---------|--------|--------|---------|--------|--------|--------------|--------|--------|---------|--------|--------|---------|--------|--------|
|      | $^4C_1$    |        |        | $^1C_4$ |        |        | $^2S_0$ |        |        | $^4C_1$      |        |        | $^1C_4$ |        |        | $^2S_0$ |        |        |
|      | gg         | gt     | tg     | gg      | gt     | tg     | gg      | gt     | tg     | gg           | gt     | tg     | gg      | gt     | tg     | gg      | gt     | tg     |
| C1   | 106.48     | 106.52 | 101.81 | 98.21   | 102.31 | 101.89 | 104.43  | 103.31 | 106.87 | 108.16       | 111.30 | 104.75 | 105.00  | 108.29 | 107.68 | 110.08  | 111.20 | 110.09 |
| C2   | 64.86      | 65.05  | 66.90  | 54.02   | 52.69  | 53.84  | 65.21   | 66.00  | 71.67  | 56.29        | 59.26  | 60.59  | 56.78   | 53.84  | 54.32  | 66.28   | 65.83  | 65.18  |
| C3   | 75.25      | 75.22  | 81.84  | 70.12   | 75.79  | 73.08  | 74.82   | 82.57  | 73.50  | 77.50        | 77.47  | 83.88  | 69.25   | 73.86  | 73.01  | 77.34   | 80.09  | 79.44  |
| C4   | 88.38      | 92.47  | 85.42  | 88.13   | 80.02  | 80.22  | 88.93   | 83.25  | 88.71  | 88.46        | 92.14  | 86.28  | 85.89   | 80.67  | 80.12  | 75.63   | 82.91  | 85.18  |
| C5   | 78.47      | 78.72  | 84.13  | 81.90   | 77.77  | 83.15  | 89.70   | 82.54  | 85.97  | 78.69        | 78.78  | 84.60  | 81.91   | 83.31  | 83.44  | 86.44   | 85.14  | 83.57  |
| C6   | 65.48      | 69.09  | 70.98  | 71.27   | 67.51  | 71.71  | 69.67   | 72.64  | 79.38  | 66.56        | 69.66  | 70.74  | 72.17   | 71.12  | 70.96  | 69.46   | 71.30  | 78.19  |
| C7   | 182.51     | 182.52 | 182.65 | 176.71  | 173.85 | 174.69 | 181.61  | 175.76 | 181.81 | 174.48       | 174.31 | 182.12 | 176.55  | 174.40 | 174.77 | 177.74  | 176.97 | 177.28 |
| C8   | 23.97      | 24.03  | 24.91  | 24.07   | 24.37  | 24.25  | 24.17   | 24.32  | 23.84  | 24.72        | 24.62  | 24.76  | 24.11   | 24.34  | 24.27  | 24.21   | 24.29  | 24.19  |
| H1   | 4.83       | 4.77   | 4.78   | 6.01    | 5.47   | 5.43   | 5.25    | 5.46   | 5.16   | 4.41         | 4.27   | 4.59   | 5.31    | 4.94   | 4.85   | 4.71    | 4.73   | 4.67   |
| H2   | 3.63       | 3.67   | 3.45   | 4.19    | 4.51   | 4.54   | 3.61    | 4.30   | 3.39   | 4.54         | 4.46   | 3.74   | 4.07    | 4.38   | 4.42   | 4.00    | 4.05   | 4.02   |
| H3   | 4.74       | 4.74   | 3.51   | 4.84    | 4.08   | 4.65   | 4.12    | 3.71   | 3.98   | 4.44         | 4.44   | 3.85   | 4.72    | 4.09   | 4.61   | 3.68    | 3.81   | 3.70   |
| H4   | 4.43       | 3.66   | 4.23   | 4.80    | 4.67   | 5.11   | 5.08    | 5.05   | 5.04   | 4.55         | 3.68   | 4.74   | 4.80    | 4.64   | 5.12   | 5.06    | 4.75   | 5.35   |
| H5   | 4.17       | 4.35   | 3.82   | 4.09    | 4.95   | 4.15   | 3.90    | 3.75   | 3.80   | 4.26         | 4.36   | 3.58   | 4.02    | 4.74   | 4.11   | 4.01    | 3.79   | 3.51   |
| H6   | 4.05       | 3.69   | 4.06   | 4.18    | 4.00   | 4.66   | 4.05    | 3.81   | 4.33   | 4.46         | 3.76   | 4.21   | 4.21    | 3.94   | 4.62   | 3.88    | 3.59   | 4.31   |
| H7   | 4.08       | 4.13   | 3.93   | 3.92    | 4.67   | 4.02   | 3.51    | 3.91   | 4.32   | 4.17         | 4.20   | 3.90   | 3.92    | 4.61   | 4.09   | 4.74    | 4.22   | 4.18   |
| H8   | 5.86       | 5.77   | 5.74   | 6.86    | 6.52   | 7.08   | 6.55    | 5.10   | 6.07   | 4.81         | 4.48   | 5.91   | 6.98    | 6.83   | 7.12   | 5.34    | 5.22   | 5.18   |
| H9   | 1.68       | 1.68   | 1.76   | 1.81    | 1.58   | 1.70   | 1.74    | 1.57   | 1.72   | 1.56         | 1.48   | 1.75   | 1.80    | 1.62   | 1.71   | 1.66    | 1.61   | 1.60   |
| H10  | 2.16       | 2.19   | 2.24   | 1.91    | 2.03   | 1.09   | 2.16    | 2.06   | 2.16   | 2.19         | 2.11   | 2.24   | 1.93    | 2.01   | 1.99   | 2.13    | 2.10   | 2.08   |
| H11  | 2.21       | 2.21   | 2.30   | 2.02    | 2.11   | 2.09   | 2.18    | 2.19   | 2.19   | 2.19         | 2.17   | 2.26   | 1.97    | 2.11   | 2.08   | 2.23    | 2.21   | 2.18   |

Supplementary Table 3. Chemical shifts (ppm) calculated by GIAO approach (B3LYP/6-311++G(2d,p)) for GlcNAc(6S)

| Atom | GlcNAc(6S) |        |        |         |        |        |         |        |        | M-GlcNAc(6S) |        |        |         |        |        |         |        |        |
|------|------------|--------|--------|---------|--------|--------|---------|--------|--------|--------------|--------|--------|---------|--------|--------|---------|--------|--------|
|      | $^4C_1$    |        |        | $^1C_4$ |        |        | $^2S_0$ |        |        | $^4C_1$      |        |        | $^1C_4$ |        |        | $^2S_0$ |        |        |
|      | gg         | gt     | tg     | gg      | gt     | tg     | gg      | gt     | tg     | gg           | gt     | tg     | gg      | gt     | tg     | gg      | gt     | tg     |
| C1   | 104.16     | 104.27 | 107.93 | 100.62  | 103.05 | 102.83 | 107.55  | 106.24 | 106.85 | 109.72       | 111.25 | 104.06 | 105.74  | 108.67 | 109.08 | 108.42  | 110.57 | 112.61 |
| C2   | 65.71      | 65.23  | 62.81  | 50.60   | 51.82  | 54.19  | 64.34   | 68.14  | 68.84  | 56.49        | 61.90  | 60.08  | 52.81   | 54.00  | 54.58  | 61.00   | 69.54  | 64.15  |
| C3   | 81.49      | 82.45  | 81.85  | 76.90   | 74.49  | 75.05  | 81.98   | 84.24  | 73.86  | 84.77        | 83.53  | 81.62  | 76.66   | 73.59  | 74.94  | 85.35   | 85.48  | 80.72  |
| C4   | 74.37      | 78.70  | 85.70  | 77.92   | 78.75  | 73.73  | 80.89   | 74.04  | 81.38  | 75.82        | 79.15  | 78.34  | 77.19   | 79.34  | 73.55  | 78.88   | 71.93  | 77.01  |
| C5   | 86.78      | 87.11  | 76.13  | 88.57   | 87.56  | 82.72  | 85.41   | 82.44  | 89.45  | 85.46        | 89.07  | 80.00  | 87.86   | 86.12  | 82.86  | 78.82   | 85.90  | 85.90  |
| C6   | 69.53      | 71.15  | 73.52  | 71.92   | 79.50  | 74.31  | 74.90   | 79.47  | 80.30  | 68.23        | 71.46  | 73.87  | 72.32   | 75.70  | 73.73  | 69.96   | 78.13  | 79.46  |
| C7   | 184.44     | 184.56 | 182.66 | 174.26  | 173.41 | 173.99 | 179.50  | 178.75 | 180.56 | 177.29       | 178.48 | 180.86 | 174.58  | 174.33 | 173.90 | 173.57  | 178.50 | 176.19 |
| C8   | 24.54      | 24.01  | 23.94  | 24.30   | 24.37  | 24.51  | 24.00   | 24.26  | 24.08  | 24.57        | 24.41  | 24.60  | 24.35   | 24.31  | 24.58  | 24.45   | 24.13  | 24.65  |
| H1   | 4.99       | 4.88   | 4.63   | 5.54    | 5.51   | 5.25   | 5.29    | 5.12   | 5.22   | 4.78         | 4.27   | 4.55   | 4.99    | 4.98   | 4.61   | 4.86    | 4.40   | 4.21   |
| H2   | 3.71       | 3.67   | 3.79   | 4.74    | 4.56   | 4.54   | 4.06    | 3.71   | 3.31   | 4.70         | 4.30   | 3.68   | 4.54    | 4.38   | 4.43   | 4.47    | 3.82   | 4.15   |
| H3   | 3.34       | 3.41   | 3.65   | 4.11    | 4.07   | 4.38   | 3.46    | 3.73   | 3.86   | 3.16         | 3.31   | 3.84   | 4.02    | 4.06   | 4.32   | 3.64    | 3.63   | 3.68   |
| H4   | 4.60       | 3.27   | 3.88   | 5.05    | 4.10   | 4.86   | 4.32    | 4.26   | 4.15   | 4.02         | 3.25   | 4.17   | 5.20    | 4.21   | 4.82   | 4.66    | 4.22   | 4.39   |
| H5   | 3.24       | 3.82   | 3.50   | 3.97    | 3.97   | 3.78   | 4.24    | 3.92   | 4.11   | 3.10         | 3.69   | 3.83   | 3.93    | 4.01   | 3.75   | 3.72    | 3.97   | 3.85   |
| H6   | 4.22       | 4.69   | 4.91   | 4.10    | 3.92   | 5.94   | 4.57    | 4.90   | 4.22   | 4.43         | 4.76   | 5.08   | 4.12    | 4.15   | 5.88   | 4.32    | 4.84   | 4.09   |
| H7   | 4.96       | 4.25   | 4.40   | 4.51    | 5.37   | 4.03   | 4.42    | 4.38   | 5.09   | 5.21         | 4.30   | 4.52   | 4.47    | 4.64   | 4.07   | 4.48    | 4.42   | 5.09   |
| H8   | 6.24       | 6.04   | 5.66   | 6.83    | 7.02   | 6.89   | 6.05    | 5.33   | 6.14   | 4.60         | 4.83   | 5.94   | 7.03    | 7.21   | 6.93   | 5.47    | 5.44   | 5.11   |
| H9   | 1.77       | 1.76   | 1.67   | 1.56    | 1.51   | 1.52   | 1.66    | 1.59   | 1.68   | 1.64         | 1.72   | 1.72   | 1.58    | 1.57   | 1.54   | 1.50    | 1.59   | 1.60   |
| H10  | 2.22       | 2.27   | 2.21   | 2.11    | 2.05   | 2.00   | 2.19    | 2.17   | 2.15   | 2.40         | 2.11   | 2.25   | 2.10    | 2.05   | 2.02   | 2.13    | 2.17   | 2.18   |
| H11  | 2.32       | 2.32   | 2.26   | 2.14    | 2.05   | 2.07   | 2.19    | 2.20   | 2.19   | 2.15         | 2.37   | 2.28   | 2.12    | 2.09   | 2.07   | 2.17    | 2.19   | 2.19   |

Supplementary Table 4. Chemical shifts (ppm) calculated by GIAO approach (B3LYP/6-311++G(2d,p)) for GlcNAc(46S)

| Atom | GlcNAc(46S) |        |        |         |        |        |         |        |        | M-GlcNAc(46S) |        |        |         |        |        |         |        |        |
|------|-------------|--------|--------|---------|--------|--------|---------|--------|--------|---------------|--------|--------|---------|--------|--------|---------|--------|--------|
|      | $^4C_1$     |        |        | $^1C_4$ |        |        | $^2S_0$ |        |        | $^4C_1$       |        |        | $^1C_4$ |        |        | $^2S_0$ |        |        |
|      | gg          | gt     | tg     | gg      | gt     | tg     | gg      | gt     | tg     | gg            | gt     | tg     | gg      | gt     | tg     | gg      | gt     | tg     |
| C1   | 104.76      | 105.53 | 106.98 | 100.23  | 102.43 | 102.41 | 105.02  | 106.70 | 106.72 | 111.01        | 109.46 | 109.34 | 105.35  | 108.51 | 108.82 | 106.69  | 112.78 | 110.28 |
| C2   | 67.15       | 64.62  | 63.00  | 52.55   | 55.50  | 59.90  | 67.56   | 58.74  | 62.20  | 58.39         | 57.49  | 56.19  | 53.28   | 56.90  | 60.35  | 63.13   | 58.50  | 67.86  |
| C3   | 77.22       | 75.49  | 80.23  | 75.59   | 68.40  | 76.03  | 82.73   | 75.74  | 75.09  | 76.70         | 76.83  | 82.29  | 74.56   | 67.93  | 75.76  | 77.64   | 75.42  | 76.99  |
| C4   | 78.01       | 86.00  | 91.32  | 84.92   | 77.75  | 79.01  | 85.17   | 85.54  | 91.21  | 85.04         | 86.16  | 91.71  | 81.04   | 78.53  | 78.47  | 86.78   | 85.38  | 89.85  |
| C5   | 83.98       | 77.51  | 76.83  | 81.27   | 84.99  | 81.04  | 83.52   | 84.81  | 89.77  | 82.60         | 78.64  | 77.47  | 84.63   | 84.30  | 80.88  | 85.45   | 84.87  | 79.78  |
| C6   | 72.68       | 74.48  | 75.84  | 77.65   | 79.46  | 69.87  | 79.60   | 79.39  | 77.02  | 71.20         | 75.15  | 75.00  | 72.68   | 74.81  | 69.15  | 79.48   | 79.56  | 75.70  |
| C7   | 184.50      | 184.81 | 183.89 | 173.86  | 185.93 | 181.24 | 179.85  | 175.44 | 183.43 | 178.84        | 178.44 | 175.73 | 174.70  | 186.21 | 181.22 | 177.73  | 175.17 | 178.22 |
| C8   | 24.52       | 24.06  | 24.03  | 24.52   | 26.89  | 24.46  | 24.04   | 24.55  | 24.29  | 24.27         | 24.55  | 24.53  | 24.35   | 27.09  | 24.43  | 25.05   | 24.58  | 24.49  |
| H1   | 5.15        | 4.97   | 4.63   | 5.52    | 5.52   | 5.74   | 5.32    | 5.02   | 5.25   | 4.71          | 4.68   | 4.45   | 4.98    | 4.90   | 5.12   | 5.17    | 4.44   | 5.16   |
| H2   | 3.69        | 3.60   | 3.73   | 4.47    | 3.91   | 4.19   | 4.45    | 4.49   | 3.31   | 4.19          | 4.28   | 4.55   | 4.46    | 3.93   | 4.06   | 4.33    | 4.47   | 3.56   |
| H3   | 3.66        | 5.14   | 3.86   | 3.86    | 5.21   | 4.22   | 3.72    | 3.74   | 3.85   | 4.53          | 4.90   | 3.63   | 4.53    | 5.26   | 4.19   | 5.54    | 3.74   | 3.99   |
| H4   | 5.42        | 3.58   | 4.56   | 5.02    | 4.39   | 5.61   | 5.30    | 4.69   | 4.79   | 4.15          | 3.54   | 4.71   | 5.59    | 4.48   | 5.58   | 6.42    | 4.66   | 4.72   |
| H5   | 3.71        | 5.56   | 3.43   | 4.89    | 4.40   | 4.57   | 4.91    | 5.54   | 5.92   | 4.53          | 5.48   | 3.31   | 4.21    | 4.44   | 4.57   | 4.44    | 5.48   | 4.64   |
| H6   | 4.92        | 4.90   | 4.81   | 4.24    | 4.12   | 5.63   | 5.28    | 4.93   | 4.61   | 5.13          | 5.09   | 4.79   | 4.14    | 4.20   | 5.51   | 4.34    | 4.77   | 4.76   |
| H7   | 4.59        | 3.73   | 4.50   | 4.37    | 5.20   | 4.04   | 5.02    | 5.20   | 4.18   | 4.31          | 3.81   | 4.47   | 4.61    | 4.79   | 4.07   | 5.17    | 5.19   | 4.59   |
| H8   | 6.38        | 6.44   | 5.88   | 6.39    | 5.53   | 5.31   | 5.47    | 4.44   | 6.58   | 5.07          | 4.90   | 4.67   | 6.74    | 5.58   | 5.28   | 5.51    | 4.45   | 5.77   |
| H9   | 1.81        | 1.82   | 1.73   | 1.61    | 1.77   | 1.78   | 1.67    | 1.60   | 1.81   | 1.69          | 1.73   | 1.55   | 1.63    | 1.78   | 1.78   | 1.64    | 1.53   | 1.69   |
| H10  | 2.25        | 2.21   | 2.20   | 2.03    | 1.76   | 2.14   | 2.24    | 2.22   | 2.26   | 2.15          | 2.12   | 2.16   | 2.06    | 1.82   | 2.13   | 2.12    | 2.20   | 2.09   |
| H11  | 2.33        | 2.29   | 2.22   | 2.06    | 3.14   | 2.41   | 2.24    | 2.26   | 2.33   | 2.26          | 2.36   | 2.26   | 2.07    | 3.17   | 2.39   | 2.13    | 2.23   | 2.13   |

Supplementary Table 5. Chemical shifts (ppm) calculated by GIAO approach (B3LYP/6-311++G(2d,p)) for GalNAc

| Atom | GalNAc  |        |        |         |        |        |         |        |        | M-GalNAc |        |        |         |        |        |         |        |        |
|------|---------|--------|--------|---------|--------|--------|---------|--------|--------|----------|--------|--------|---------|--------|--------|---------|--------|--------|
|      | $^4C_1$ |        |        | $^1C_4$ |        |        | $^2S_0$ |        |        | $^4C_1$  |        |        | $^1C_4$ |        |        | $^2S_0$ |        |        |
|      | gg      | gt     | tg     | gg      | gt     | tg     | gg      | gt     | tg     | gg       | gt     | tg     | gg      | gt     | tg     | gg      | gt     | tg     |
| C1   | 107.61  | 107.80 | 107.12 | 100.53  | 102.48 | 104.36 | 104.64  | 106.10 | 107.42 | 109.99   | 110.06 | 108.17 | 107.27  | 109.16 | 110.27 | 112.74  | 112.45 | 111.88 |
| C2   | 62.41   | 64.23  | 62.65  | 54.64   | 54.15  | 55.07  | 63.75   | 62.29  | 64.02  | 59.30    | 66.62  | 54.42  | 56.55   | 55.54  | 55.65  | 62.78   | 60.53  | 60.72  |
| C3   | 78.92   | 78.73  | 77.19  | 72.65   | 76.81  | 79.42  | 72.89   | 72.15  | 75.23  | 84.62    | 75.70  | 79.41  | 73.41   | 75.82  | 79.59  | 71.49   | 82.17  | 81.74  |
| C4   | 78.46   | 76.07  | 74.61  | 69.47   | 70.96  | 74.89  | 76.88   | 75.82  | 74.13  | 81.12    | 77.96  | 74.87  | 70.43   | 71.08  | 75.34  | 75.58   | 72.82  | 72.77  |
| C5   | 78.45   | 82.35  | 78.54  | 83.86   | 78.42  | 79.00  | 83.40   | 84.42  | 83.35  | 81.14    | 85.08  | 79.33  | 83.89   | 84.94  | 78.83  | 87.38   | 87.08  | 82.78  |
| C6   | 71.58   | 67.57  | 68.44  | 65.97   | 68.14  | 73.41  | 69.71   | 66.99  | 68.83  | 72.12    | 70.78  | 67.70  | 67.16   | 68.84  | 72.64  | 66.45   | 69.41  | 68.67  |
| C7   | 183.50  | 183.47 | 182.75 | 173.92  | 173.75 | 173.12 | 182.02  | 181.03 | 182.28 | 180.58   | 176.29 | 175.65 | 173.09  | 173.58 | 173.41 | 177.40  | 179.98 | 179.97 |
| C8   | 24.11   | 24.01  | 24.08  | 24.31   | 24.32  | 24.51  | 24.01   | 24.09  | 24.26  | 24.07    | 26.14  | 24.75  | 24.43   | 24.26  | 24.64  | 25.98   | 24.24  | 24.22  |
| H1   | 4.63    | 4.58   | 4.45   | 5.25    | 5.34   | 5.15   | 5.21    | 5.20   | 5.08   | 4.48     | 4.23   | 4.35   | 4.61    | 4.75   | 4.51   | 4.55    | 4.39   | 4.27   |
| H2   | 4.04    | 3.60   | 3.94   | 4.76    | 4.89   | 5.10   | 3.47    | 3.66   | 4.26   | 4.65     | 3.13   | 4.70   | 4.75    | 4.79   | 5.04   | 4.11    | 4.08   | 3.98   |
| H3   | 3.33    | 3.36   | 3.51   | 4.03    | 3.99   | 4.08   | 3.60    | 3.76   | 3.87   | 3.38     | 4.01   | 3.29   | 3.79    | 3.95   | 4.04   | 4.42    | 3.79   | 3.83   |
| H4   | 4.31    | 3.77   | 4.35   | 4.16    | 4.03   | 3.88   | 4.56    | 4.67   | 4.81   | 4.35     | 3.93   | 4.40   | 4.19    | 4.04   | 3.85   | 4.83    | 4.34   | 4.54   |
| H5   | 3.41    | 3.65   | 3.91   | 4.32    | 4.53   | 4.46   | 4.32    | 4.39   | 4.50   | 3.31     | 3.69   | 3.90   | 4.13    | 4.53   | 4.44   | 4.29    | 4.13   | 4.28   |
| H6   | 4.05    | 4.10   | 4.15   | 3.88    | 4.46   | 4.20   | 4.14    | 4.38   | 3.76   | 4.06     | 4.28   | 4.15   | 4.03    | 4.38   | 4.30   | 3.83    | 4.50   | 3.73   |
| H7   | 4.34    | 3.66   | 4.33   | 4.67    | 4.20   | 5.31   | 4.10    | 3.67   | 4.81   | 4.36     | 4.11   | 4.28   | 4.45    | 4.37   | 5.27   | 4.20    | 3.69   | 4.57   |
| H8   | 5.67    | 5.61   | 5.67   | 5.16    | 5.21   | 5.17   | 6.15    | 6.16   | 4.95   | 5.03     | 5.71   | 4.59   | 5.17    | 5.23   | 5.20   | 5.51    | 5.19   | 5.22   |
| H9   | 1.74    | 1.73   | 1.72   | 1.51    | 1.51   | 1.46   | 1.76    | 1.73   | 1.68   | 1.60     | 1.57   | 1.55   | 1.49    | 1.51   | 1.47   | 1.57    | 1.65   | 1.62   |
| H10  | 2.23    | 2.23   | 2.18   | 2.14    | 2.14   | 2.12   | 2.19    | 2.18   | 2.25   | 2.17     | 2.20   | 2.18   | 2.13    | 2.11   | 2.11   | 2.21    | 2.26   | 2.23   |
| H11  | 2.24    | 2.26   | 2.24   | 2.16    | 2.16   | 2.21   | 2.23    | 2.23   | 2.31   | 2.20     | 2.21   | 2.23   | 2.16    | 2.16   | 2.21   | 2.21    | 2.26   | 2.26   |

Supplementary Table 6. Chemical shifts (ppm) calculated by GIAO approach (B3LYP/6-311++G(2d,p)) for GalNAc(4S)

| Atom | GalNAc(4S) |        |        |         |        |        |         |        |        | M-GalNAc(4S) |        |        |         |        |        |         |        |        |
|------|------------|--------|--------|---------|--------|--------|---------|--------|--------|--------------|--------|--------|---------|--------|--------|---------|--------|--------|
|      | $^4C_1$    |        |        | $^1C_4$ |        |        | $^2S_0$ |        |        | $^4C_1$      |        |        | $^1C_4$ |        |        | $^2S_0$ |        |        |
|      | gg         | gt     | tg     | gg      | gt     | tg     | gg      | gt     | tg     | gg           | gt     | tg     | gg      | gt     | tg     | gg      | gt     | tg     |
| C1   | 105.90     | 108.34 | 101.40 | 99.78   | 103.20 | 100.34 | 105.84  | 110.95 | 109.12 | 113.78       | 107.68 | 104.41 | 107.57  | 109.73 | 107.09 | 115.45  | 112.43 | 114.76 |
| C2   | 67.50      | 62.66  | 60.46  | 63.22   | 57.31  | 59.54  | 63.18   | 62.13  | 60.87  | 58.12        | 58.97  | 54.89  | 57.02   | 57.94  | 59.37  | 65.03   | 63.96  | 60.99  |
| C3   | 78.37      | 78.49  | 80.51  | 75.25   | 74.58  | 73.83  | 72.47   | 76.88  | 75.22  | 79.91        | 82.05  | 81.52  | 74.97   | 73.68  | 73.81  | 76.76   | 76.15  | 75.46  |
| C4   | 79.72      | 82.55  | 77.33  | 78.15   | 82.68  | 76.58  | 80.68   | 84.12  | 79.98  | 80.69        | 78.23  | 77.24  | 72.48   | 82.50  | 76.55  | 80.91   | 83.49  | 80.22  |
| C5   | 80.39      | 81.13  | 81.88  | 81.71   | 76.85  | 81.25  | 85.99   | 90.95  | 87.65  | 81.38        | 84.02  | 82.04  | 82.21   | 80.98  | 81.46  | 86.80   | 86.17  | 87.08  |
| C6   | 68.57      | 68.39  | 65.28  | 64.38   | 68.26  | 76.92  | 68.20   | 72.74  | 67.43  | 68.61        | 69.03  | 65.23  | 69.59   | 68.97  | 76.38  | 66.28   | 69.87  | 66.76  |
| C7   | 183.94     | 183.62 | 182.10 | 174.80  | 173.33 | 175.07 | 183.20  | 183.48 | 183.38 | 176.44       | 181.74 | 182.04 | 174.90  | 173.00 | 174.78 | 180.01  | 177.60 | 183.00 |
| C8   | 24.31      | 24.09  | 24.96  | 24.20   | 24.44  | 24.39  | 23.96   | 24.49  | 24.39  | 24.46        | 25.18  | 25.08  | 24.15   | 24.44  | 24.30  | 24.41   | 24.52  | 24.49  |
| H1   | 4.95       | 4.59   | 4.94   | 4.89    | 5.28   | 5.50   | 5.23    | 5.44   | 5.23   | 4.13         | 4.43   | 4.67   | 4.61    | 4.65   | 4.86   | 5.22    | 5.27   | 4.57   |
| H2   | 3.53       | 4.03   | 4.00   | 4.16    | 4.79   | 4.53   | 3.69    | 4.47   | 4.50   | 4.48         | 4.03   | 4.26   | 4.53    | 4.78   | 4.41   | 4.15    | 3.99   | 4.43   |
| H3   | 3.35       | 3.59   | 3.88   | 4.51    | 4.69   | 4.74   | 3.89    | 3.85   | 3.92   | 3.22         | 3.80   | 3.86   | 5.41    | 4.72   | 4.71   | 3.53    | 3.66   | 3.96   |
| H4   | 4.86       | 4.78   | 5.21   | 5.17    | 4.80   | 4.60   | 5.47    | 5.05   | 5.24   | 4.89         | 4.95   | 5.20   | 4.89    | 4.77   | 4.58   | 4.86    | 5.19   | 5.27   |
| H5   | 3.25       | 3.77   | 3.95   | 4.50    | 4.41   | 3.87   | 4.53    | 4.39   | 4.35   | 3.20         | 3.79   | 3.95   | 4.26    | 4.32   | 3.84   | 4.39    | 4.26   | 4.32   |
| H6   | 4.25       | 3.69   | 4.27   | 3.69    | 5.55   | 5.62   | 4.08    | 4.13   | 4.15   | 4.31         | 3.82   | 4.24   | 3.96    | 5.29   | 5.59   | 3.88    | 3.49   | 4.13   |
| H7   | 4.01       | 4.05   | 3.84   | 4.35    | 3.91   | 4.18   | 3.85    | 4.25   | 3.75   | 4.01         | 4.48   | 3.90   | 4.09    | 4.00   | 4.09   | 3.98    | 4.40   | 3.74   |
| H8   | 5.66       | 5.97   | 5.38   | 5.34    | 5.21   | 5.08   | 6.51    | 6.11   | 5.88   | 4.53         | 5.17   | 5.43   | 5.30    | 5.29   | 5.07   | 5.84    | 5.78   | 5.91   |
| H9   | 1.77       | 1.76   | 1.70   | 1.57    | 1.52   | 1.56   | 1.84    | 1.80   | 1.74   | 1.55         | 1.64   | 1.73   | 1.57    | 1.52   | 1.54   | 1.79    | 1.69   | 1.72   |
| H10  | 2.22       | 2.18   | 2.31   | 2.11    | 2.04   | 2.07   | 2.19    | 2.22   | 2.27   | 2.14         | 2.28   | 2.28   | 2.10    | 2.05   | 2.08   | 2.14    | 2.06   | 2.24   |
| H11  | 2.32       | 2.20   | 2.31   | 2.17    | 2.19   | 2.15   | 2.25    | 2.36   | 2.40   | 2.29         | 2.29   | 2.36   | 2.32    | 2.21   | 2.14   | 2.25    | 2.11   | 2.41   |

Supplementary Table 7. Chemical shifts (ppm) calculated by GIAO approach (B3LYP/6-311++G(2d,p)) for GalNAc(6S)

| Atom | GalNAc(6S) |        |        |         |        |        |         |        |        | M-GalNAc(6S) |        |        |         |        |        |         |        |        |
|------|------------|--------|--------|---------|--------|--------|---------|--------|--------|--------------|--------|--------|---------|--------|--------|---------|--------|--------|
|      | $^4C_1$    |        |        | $^1C_4$ |        |        | $^2S_0$ |        |        | $^4C_1$      |        |        | $^1C_4$ |        |        | $^2S_0$ |        |        |
|      | gg         | gt     | tg     | gg      | gt     | tg     | gg      | gt     | tg     | gg           | gt     | tg     | gg      | gt     | tg     | gg      | gt     | tg     |
| C1   | 104.71     | 104.63 | 107.79 | 100.34  | 103.03 | 103.26 | 104.28  | 104.87 | 106.38 | 110.07       | 108.22 | 108.83 | 108.32  | 109.85 | 109.83 | 109.15  | 110.01 | 110.31 |
| C2   | 63.50      | 64.97  | 62.80  | 58.38   | 54.89  | 58.23  | 66.06   | 60.86  | 62.91  | 53.94        | 55.31  | 54.87  | 57.16   | 55.24  | 58.85  | 57.17   | 58.69  | 63.26  |
| C3   | 78.89      | 78.58  | 77.32  | 75.48   | 75.27  | 78.10  | 74.69   | 80.49  | 72.79  | 81.96        | 81.26  | 79.42  | 75.26   | 76.21  | 78.11  | 79.13   | 81.41  | 76.43  |
| C4   | 76.67      | 77.82  | 72.60  | 72.79   | 71.31  | 78.69  | 74.01   | 73.87  | 73.80  | 78.28        | 79.28  | 72.72  | 72.42   | 71.69  | 78.70  | 73.79   | 72.58  | 74.26  |
| C5   | 80.80      | 86.17  | 79.38  | 82.51   | 83.91  | 81.82  | 80.45   | 80.78  | 83.79  | 80.58        | 86.80  | 79.94  | 84.50   | 83.78  | 82.09  | 82.51   | 82.64  | 81.69  |
| C6   | 74.74      | 72.63  | 70.57  | 68.22   | 78.23  | 73.90  | 73.88   | 74.21  | 75.63  | 75.36        | 73.79  | 70.31  | 71.41   | 73.93  | 73.26  | 73.78   | 70.95  | 73.74  |
| C7   | 184.52     | 185.13 | 182.71 | 174.47  | 173.47 | 172.94 | 180.40  | 181.76 | 180.47 | 177.87       | 178.28 | 175.47 | 172.63  | 173.29 | 172.90 | 173.95  | 181.65 | 176.79 |
| C8   | 24.55      | 24.12  | 24.07  | 24.02   | 24.39  | 24.27  | 24.31   | 24.18  | 24.07  | 24.59        | 24.62  | 24.69  | 24.67   | 24.38  | 24.33  | 24.44   | 24.00  | 24.50  |
| H1   | 4.90       | 4.78   | 4.46   | 5.34    | 5.39   | 5.11   | 5.27    | 5.12   | 5.12   | 4.77         | 4.60   | 4.32   | 4.59    | 4.67   | 4.50   | 4.40    | 4.64   | 4.99   |
| H2   | 3.87       | 3.41   | 3.90   | 4.30    | 4.77   | 4.93   | 5.09    | 4.28   | 3.74   | 4.98         | 4.35   | 4.64   | 4.82    | 4.93   | 4.84   | 5.75    | 4.54   | 3.82   |
| H3   | 3.28       | 3.38   | 3.42   | 4.08    | 3.98   | 4.53   | 3.68    | 3.94   | 3.70   | 3.09         | 3.30   | 3.23   | 3.81    | 3.85   | 4.48   | 3.61    | 3.92   | 3.53   |
| H4   | 4.39       | 3.91   | 4.24   | 4.55    | 4.08   | 4.04   | 4.53    | 4.47   | 4.57   | 4.36         | 4.00   | 4.29   | 4.04    | 4.03   | 4.03   | 4.34    | 4.57   | 4.41   |
| H5   | 3.47       | 4.20   | 3.64   | 4.29    | 4.43   | 3.73   | 4.10    | 4.60   | 4.40   | 3.40         | 4.51   | 3.65   | 4.16    | 4.42   | 3.70   | 4.08    | 4.83   | 4.15   |
| H6   | 4.34       | 4.81   | 4.77   | 4.79    | 4.62   | 6.12   | 4.89    | 5.00   | 4.31   | 4.32         | 4.71   | 4.77   | 4.07    | 4.74   | 6.03   | 4.45    | 4.93   | 4.08   |
| H7   | 5.41       | 4.03   | 4.12   | 4.33    | 5.19   | 4.11   | 4.93    | 4.38   | 5.65   | 5.42         | 4.17   | 4.08   | 4.96    | 4.49   | 4.14   | 5.11    | 4.40   | 5.64   |
| H8   | 6.18       | 5.91   | 5.64   | 5.18    | 5.17   | 5.00   | 5.36    | 5.12   | 5.99   | 4.61         | 4.76   | 4.62   | 5.18    | 5.24   | 5.02   | 4.77    | 5.04   | 5.48   |
| H9   | 1.82       | 1.81   | 1.71   | 1.53    | 1.51   | 1.45   | 1.67    | 1.65   | 1.70   | 1.63         | 1.65   | 1.55   | 1.49    | 1.49   | 1.45   | 1.46    | 1.60   | 1.64   |
| H10  | 2.26       | 2.31   | 2.16   | 2.18    | 2.09   | 2.13   | 2.18    | 2.23   | 2.14   | 2.18         | 2.21   | 2.13   | 2.07    | 2.12   | 2.12   | 2.20    | 2.21   | 2.08   |
| H11  | 2.32       | 2.32   | 2.20   | 2.18    | 2.15   | 2.15   | 2.30    | 2.26   | 2.18   | 2.38         | 2.38   | 2.23   | 2.19    | 2.18   | 2.15   | 2.22    | 2.33   | 2.08   |

Supplementary Table 8. Chemical shifts (ppm) calculated by GIAO approach (B3LYP/6-311++G(2d,p)) for GalNAc(46S)

| Atom | GalNAc(46S)    |        |        |                |        |        |                |        |        | M-GalNAc(46S)  |        |        |                |        |        |                |        |        |
|------|----------------|--------|--------|----------------|--------|--------|----------------|--------|--------|----------------|--------|--------|----------------|--------|--------|----------------|--------|--------|
|      | $^4\text{C}_1$ |        |        | $^1\text{C}_4$ |        |        | $^2\text{S}_0$ |        |        | $^4\text{C}_1$ |        |        | $^1\text{C}_4$ |        |        | $^2\text{S}_0$ |        |        |
|      | gg             | gt     | tg     | gg             | gt     | tg     | gg             | gt     | tg     | gg             | gt     | tg     | gg             | gt     | tg     | gg             | gt     | tg     |
| C1   | 105.58         | 107.39 | 108.15 | 101.58         | 102.65 | 102.95 | 108.31         | 102.39 | 108.93 | 111.31         | 113.72 | 109.40 | 104.89         | 108.93 | 108.10 | 113.09         | 112.17 | 111.81 |
| C2   | 63.70          | 60.96  | 61.91  | 53.63          | 54.81  | 57.25  | 61.40          | 67.50  | 67.68  | 55.87          | 55.12  | 54.44  | 63.54          | 54.96  | 58.11  | 66.85          | 63.96  | 62.38  |
| C3   | 77.19          | 80.14  | 78.24  | 72.92          | 78.34  | 77.48  | 72.55          | 66.27  | 76.10  | 80.10          | 82.20  | 80.33  | 67.95          | 78.57  | 77.51  | 85.06          | 67.01  | 75.51  |
| C4   | 77.83          | 80.31  | 83.84  | 74.80          | 74.34  | 84.57  | 79.51          | 75.88  | 83.26  | 78.69          | 79.98  | 84.17  | 76.97          | 74.69  | 84.70  | 84.65          | 80.01  | 79.02  |
| C5   | 81.65          | 79.40  | 76.57  | 79.26          | 78.37  | 82.22  | 84.07          | 84.66  | 82.06  | 80.51          | 79.20  | 77.17  | 81.58          | 80.43  | 82.00  | 84.64          | 86.97  | 80.38  |
| C6   | 73.48          | 67.34  | 72.53  | 69.61          | 74.66  | 72.26  | 68.65          | 74.81  | 70.83  | 74.12          | 67.50  | 72.13  | 69.63          | 72.86  | 71.46  | 68.63          | 77.31  | 74.68  |
| C7   | 185.08         | 184.85 | 183.33 | 173.61         | 174.83 | 174.88 | 183.55         | 182.12 | 182.45 | 178.57         | 179.71 | 176.07 | 182.87         | 174.81 | 174.91 | 183.03         | 179.68 | 176.95 |
| C8   | 24.42          | 24.36  | 23.94  | 24.43          | 24.27  | 23.98  | 24.95          | 25.32  | 23.71  | 24.57          | 24.37  | 24.80  | 26.69          | 24.19  | 24.03  | 24.63          | 25.09  | 24.83  |
| H1   | 4.91           | 4.83   | 4.49   | 5.26           | 5.43   | 5.35   | 5.08           | 7.13   | 5.47   | 4.77           | 4.60   | 4.31   | 4.73           | 4.79   | 4.69   | 4.45           | 6.05   | 5.21   |
| H2   | 3.97           | 4.72   | 4.02   | 5.08           | 4.84   | 4.76   | 4.20           | 2.93   | 4.30   | 4.76           | 5.22   | 4.77   | 4.04           | 4.87   | 4.65   | 4.38           | 2.90   | 3.95   |
| H3   | 3.51           | 3.57   | 3.50   | 4.74           | 4.27   | 5.15   | 4.00           | 4.71   | 3.74   | 3.37           | 3.49   | 3.39   | 5.67           | 4.39   | 5.09   | 4.10           | 4.70   | 3.63   |
| H4   | 5.03           | 4.68   | 5.21   | 4.97           | 5.28   | 4.69   | 5.25           | 5.52   | 4.85   | 4.94           | 4.66   | 5.17   | 5.13           | 5.12   | 4.63   | 5.28           | 5.75   | 5.44   |
| H5   | 3.64           | 4.02   | 4.36   | 4.42           | 4.49   | 4.53   | 4.62           | 5.49   | 4.59   | 3.60           | 3.92   | 4.34   | 4.47           | 4.54   | 4.44   | 4.09           | 4.89   | 4.54   |
| H6   | 4.42           | 4.70   | 4.05   | 4.27           | 4.51   | 4.80   | 4.27           | 4.02   | 4.59   | 4.53           | 4.57   | 4.00   | 4.28           | 4.61   | 4.78   | 4.60           | 4.70   | 3.86   |
| H7   | 4.96           | 4.25   | 4.92   | 4.15           | 4.87   | 4.36   | 4.57           | 5.59   | 4.40   | 4.95           | 4.19   | 4.90   | 4.44           | 4.71   | 4.51   | 4.22           | 5.53   | 5.38   |
| H8   | 6.53           | 6.72   | 5.96   | 5.30           | 5.29   | 5.19   | 5.98           | 5.28   | 6.04   | 4.61           | 5.16   | 4.71   | 5.37           | 5.29   | 5.21   | 5.39           | 5.54   | 6.04   |
| H9   | 1.84           | 1.87   | 1.74   | 1.55           | 1.60   | 1.55   | 1.83           | 1.86   | 1.78   | 1.68           | 1.76   | 1.56   | 1.78           | 1.60   | 1.55   | 1.73           | 1.75   | 1.70   |
| H10  | 2.21           | 2.20   | 2.19   | 2.15           | 2.06   | 2.16   | 2.29           | 2.01   | 2.22   | 2.11           | 2.10   | 2.17   | 2.26           | 2.06   | 2.16   | 2.20           | 2.02   | 2.01   |
| H11  | 2.35           | 2.35   | 2.21   | 2.35           | 2.29   | 2.21   | 2.35           | 2.45   | 2.24   | 2.43           | 2.36   | 2.22   | 2.28           | 2.32   | 2.22   | 2.37           | 2.37   | 2.11   |



Supplementary Table 9. Chemical shifts (ppm) calculated by GIAO approach (B3LYP/6-311++G(2d,p)) for GlcUA and IdoUA

| Atom | GlcUA          |                |                | M-GlcUA        |                |                | IdoUA          |                |                | M-IdoUA        |                |                |
|------|----------------|----------------|----------------|----------------|----------------|----------------|----------------|----------------|----------------|----------------|----------------|----------------|
|      | $^4\text{C}_1$ | $^1\text{C}_4$ | $^2\text{S}_0$ | $^4\text{C}_1$ | $^1\text{C}_4$ | $^2\text{S}_0$ | $^4\text{C}_1$ | $^1\text{C}_4$ | $^2\text{S}_0$ | $^4\text{C}_1$ | $^1\text{C}_4$ | $^2\text{S}_0$ |
| C1   | 104.49         | 105.19         | 105.93         | 107.26         | 113.74         | 118.95         | 101.26         | 106.04         | 106.86         | 107.20         | 111.78         | 112.41         |
| C2   | 83.30          | 72.76          | 82.67          | 74.19          | 76.58          | 79.82          | 85.08          | 74.57          | 83.91          | 80.65          | 75.46          | 83.66          |
| C3   | 85.19          | 75.16          | 79.30          | 85.69          | 75.14          | 81.85          | 82.85          | 76.30          | 83.73          | 83.34          | 76.58          | 83.90          |
| C4   | 79.25          | 81.87          | 87.00          | 79.56          | 78.08          | 80.77          | 78.29          | 79.06          | 80.41          | 78.21          | 79.15          | 80.32          |
| C5   | 80.44          | 86.73          | 93.05          | 80.54          | 83.96          | 87.25          | 79.21          | 72.32          | 78.49          | 78.92          | 72.23          | 78.23          |
| C6   | 192.07         | 193.81         | 196.03         | 192.32         | 186.62         | 191.77         | 193.01         | 193.79         | 191.01         | 193.66         | 193.81         | 191.45         |
| H1   | 4.60           | 5.56           | 4.86           | 4.66           | 5.12           | 4.81           | 5.31           | 5.47           | 5.36           | 5.07           | 4.92           | 4.44           |
| H2   | 3.27           | 3.77           | 3.60           | 4.01           | 3.57           | 4.61           | 3.17           | 3.83           | 3.48           | 3.56           | 3.72           | 3.42           |
| H3   | 3.65           | 4.27           | 3.94           | 3.66           | 4.50           | 3.86           | 3.34           | 4.37           | 5.02           | 3.33           | 4.33           | 3.72           |
| H4   | 3.59           | 4.84           | 4.28           | 3.57           | 5.62           | 4.96           | 3.71           | 3.82           | 3.48           | 3.74           | 3.79           | 4.20           |
| H5   | 3.91           | 4.39           | 4.56           | 3.91           | 4.29           | 4.35           | 4.61           | 5.07           | 3.70           | 4.61           | 4.84           | 4.46           |

Supplementary Table 10. Chemical shifts (ppm) calculated by GIAO approach (B3LYP/6-311++G(2d,p)) for GlcUA(2S) and IdoUA(2S)

| Atom | GlcUA(2S) |         |         | M-GlcUA(2S) |         |         | IdoUA(2S) |         |         | M-IdoUA(2S) |         |         |
|------|-----------|---------|---------|-------------|---------|---------|-----------|---------|---------|-------------|---------|---------|
|      | $^4C_1$   | $^1C_4$ | $^2S_0$ | $^4C_1$     | $^1C_4$ | $^2S_0$ | $^4C_1$   | $^1C_4$ | $^2S_0$ | $^4C_1$     | $^1C_4$ | $^2S_0$ |
| C1   | 103.72    | 105.83  | 106.25  | 110.67      | 109.82  | 115.82  | 102.09    | 104.27  | 108.09  | 107.12      | 110.27  | 111.57  |
| C2   | 86.42     | 75.70   | 88.53   | 84.00       | 80.24   | 82.42   | 84.67     | 77.25   | 86.77   | 85.10       | 74.83   | 86.21   |
| C3   | 87.11     | 78.57   | 75.59   | 88.53       | 70.84   | 88.20   | 82.85     | 76.37   | 79.86   | 86.57       | 72.49   | 79.92   |
| C4   | 79.62     | 77.39   | 85.30   | 79.03       | 78.80   | 82.33   | 79.70     | 76.31   | 79.66   | 78.23       | 78.43   | 79.64   |
| C5   | 79.40     | 82.66   | 93.78   | 77.73       | 80.89   | 88.91   | 77.31     | 71.00   | 79.44   | 77.14       | 71.08   | 78.78   |
| C6   | 191.00    | 185.73  | 196.46  | 191.88      | 194.08  | 189.20  | 192.78    | 193.83  | 190.27  | 192.73      | 193.27  | 190.63  |
| H1   | 4.83      | 5.65    | 5.44    | 4.39        | 4.88    | 4.76    | 5.04      | 5.53    | 5.73    | 5.00        | 5.00    | 5.12    |
| H2   | 4.59      | 4.57    | 4.32    | 4.84        | 4.56    | 6.08    | 4.32      | 4.29    | 4.49    | 4.65        | 4.52    | 4.36    |
| H3   | 3.99      | 4.28    | 3.92    | 4.02        | 5.38    | 3.34    | 3.49      | 4.63    | 4.01    | 3.76        | 4.82    | 4.00    |
| H4   | 3.75      | 5.16    | 4.14    | 3.74        | 4.44    | 4.95    | 3.84      | 4.15    | 4.31    | 3.79        | 4.16    | 4.28    |
| H5   | 3.87      | 4.52    | 4.78    | 3.76        | 4.43    | 4.42    | 4.58      | 5.08    | 4.53    | 4.58        | 4.68    | 4.38    |

Supplementary Table 11. Chemical shifts (ppm) calculated by GIAO approach (B3LYP/6-311++G(2d,p)) for GlcUA(3S) and IdoUA(3S)

| Atom | GlcUA(3S)                   |                             |                             | M-GlcUA(3S)                 |                             |                             | IdoUA(3S)                   |                             |                             | M-IdoUA(3S)                 |                             |                             |
|------|-----------------------------|-----------------------------|-----------------------------|-----------------------------|-----------------------------|-----------------------------|-----------------------------|-----------------------------|-----------------------------|-----------------------------|-----------------------------|-----------------------------|
|      | <sup>4</sup> C <sub>1</sub> | <sup>1</sup> C <sub>4</sub> | <sup>2</sup> S <sub>0</sub> | <sup>4</sup> C <sub>1</sub> | <sup>1</sup> C <sub>4</sub> | <sup>2</sup> S <sub>0</sub> | <sup>4</sup> C <sub>1</sub> | <sup>1</sup> C <sub>4</sub> | <sup>2</sup> S <sub>0</sub> | <sup>4</sup> C <sub>1</sub> | <sup>1</sup> C <sub>4</sub> | <sup>2</sup> S <sub>0</sub> |
| C1   | 103.49                      | 105.28                      | 104.96                      | 110.68                      | 110.36                      | 106.24                      | 103.87                      | 106.25                      | 106.05                      | 110.28                      | 112.13                      | 111.77                      |
| C2   | 82.17                       | 78.24                       | 81.88                       | 79.69                       | 74.85                       | 90.16                       | 83.13                       | 74.24                       | 81.60                       | 80.64                       | 75.47                       | 81.29                       |
| C3   | 87.51                       | 83.41                       | 86.79                       | 89.75                       | 82.05                       | 85.48                       | 86.36                       | 79.59                       | 94.06                       | 87.27                       | 79.82                       | 94.10                       |
| C4   | 77.31                       | 78.82                       | 86.61                       | 76.71                       | 78.74                       | 85.48                       | 76.30                       | 72.66                       | 79.54                       | 76.02                       | 72.97                       | 79.37                       |
| C5   | 82.85                       | 87.03                       | 89.66                       | 81.98                       | 84.54                       | 89.76                       | 81.97                       | 73.21                       | 78.56                       | 81.88                       | 72.77                       | 78.34                       |
| C6   | 191.62                      | 189.17                      | 195.35                      | 192.53                      | 185.16                      | 195.66                      | 190.14                      | 193.92                      | 191.60                      | 190.89                      | 193.83                      | 191.87                      |
| H1   | 4.99                        | 5.39                        | 4.98                        | 4.48                        | 5.13                        | 5.12                        | 6.25                        | 5.45                        | 5.31                        | 5.82                        | 4.92                        | 4.78                        |
| H2   | 3.54                        | 3.86                        | 3.94                        | 3.72                        | 4.05                        | 3.36                        | 3.44                        | 3.81                        | 3.88                        | 3.51                        | 3.68                        | 3.84                        |
| H3   | 4.43                        | 4.52                        | 4.44                        | 4.46                        | 4.68                        | 4.58                        | 4.43                        | 5.05                        | 4.91                        | 4.36                        | 5.02                        | 4.91                        |
| H4   | 4.25                        | 5.22                        | 4.65                        | 4.19                        | 5.57                        | 4.33                        | 3.66                        | 4.72                        | 4.18                        | 3.64                        | 4.74                        | 4.15                        |
| H5   | 4.15                        | 4.47                        | 4.75                        | 4.06                        | 4.28                        | 4.78                        | 4.78                        | 4.96                        | 4.74                        | 4.69                        | 4.82                        | 4.52                        |

Supplementary Table 12. Chemical shifts (ppm) calculated by GIAO approach (B3LYP/6-311++G(2d,p)) for GlcUA(23S) and IdoUA(23S)

| Atom | GlcUA(23S)                  |                             |                             | M-GlcUA(23S)                |                             |                             | IdoUA(23S)                  |                             |                             | M-IdoUA(23S)                |                             |                             |
|------|-----------------------------|-----------------------------|-----------------------------|-----------------------------|-----------------------------|-----------------------------|-----------------------------|-----------------------------|-----------------------------|-----------------------------|-----------------------------|-----------------------------|
|      | <sup>4</sup> C <sub>1</sub> | <sup>1</sup> C <sub>4</sub> | <sup>2</sup> S <sub>0</sub> | <sup>4</sup> C <sub>1</sub> | <sup>1</sup> C <sub>4</sub> | <sup>2</sup> S <sub>0</sub> | <sup>4</sup> C <sub>1</sub> | <sup>1</sup> C <sub>4</sub> | <sup>2</sup> S <sub>0</sub> | <sup>4</sup> C <sub>1</sub> | <sup>1</sup> C <sub>4</sub> | <sup>2</sup> S <sub>0</sub> |
| C1   | 106.78                      | 97.91                       | 106.13                      | 111.01                      | 103.63                      | 115.64                      | 102.18                      | 100.07                      | 105.87                      | 112.60                      | 104.25                      | 112.50                      |
| C2   | 84.17                       | 86.55                       | 84.78                       | 85.23                       | 82.00                       | 78.13                       | 82.63                       | 81.15                       | 82.10                       | 83.06                       | 77.75                       | 80.38                       |
| C3   | 86.38                       | 86.46                       | 85.30                       | 92.54                       | 85.04                       | 85.59                       | 90.11                       | 85.69                       | 90.86                       | 87.21                       | 84.49                       | 92.83                       |
| C4   | 83.87                       | 75.96                       | 87.79                       | 78.06                       | 74.16                       | 85.13                       | 82.20                       | 75.22                       | 83.26                       | 77.51                       | 73.83                       | 82.71                       |
| C5   | 84.02                       | 91.78                       | 90.07                       | 82.04                       | 89.88                       | 92.82                       | 76.73                       | 77.10                       | 74.27                       | 81.34                       | 79.54                       | 73.91                       |
| C6   | 187.08                      | 188.90                      | 194.69                      | 191.39                      | 183.77                      | 178.05                      | 193.37                      | 195.60                      | 190.97                      | 191.41                      | 195.75                      | 192.10                      |
| H1   | 5.03                        | 7.10                        | 4.95                        | 4.36                        | 6.70                        | 4.85                        | 4.91                        | 6.72                        | 5.54                        | 5.58                        | 6.46                        | 4.88                        |
| H2   | 4.39                        | 4.67                        | 4.96                        | 4.71                        | 4.94                        | 6.06                        | 4.35                        | 4.45                        | 4.31                        | 4.53                        | 4.45                        | 4.98                        |
| H3   | 4.47                        | 4.42                        | 4.43                        | 4.79                        | 4.58                        | 4.02                        | 4.56                        | 5.08                        | 4.81                        | 4.54                        | 4.95                        | 4.70                        |
| H4   | 3.91                        | 5.00                        | 4.80                        | 4.19                        | 5.46                        | 5.04                        | 4.24                        | 5.81                        | 4.54                        | 3.78                        | 5.97                        | 4.73                        |
| H5   | 4.01                        | 4.78                        | 4.79                        | 4.09                        | 4.44                        | 3.91                        | 4.52                        | 6.18                        | 4.87                        | 4.80                        | 6.60                        | 4.62                        |

Supplementary Table 13.  $^3J_{H-H}$  (Hz) calculated by GIAO approach (B3LYP/6-311++G(2d,p)) for GlcNAc and GlcNAc(4S)

| Atomic pair | GlcNAc     |      |      |         |      |      |         |      |      | M-GlcNAc     |      |      |         |      |      |         |      |      |
|-------------|------------|------|------|---------|------|------|---------|------|------|--------------|------|------|---------|------|------|---------|------|------|
|             | $^4C_1$    |      |      | $^1C_4$ |      |      | $^2S_0$ |      |      | $^4C_1$      |      |      | $^1C_4$ |      |      | $^2S_0$ |      |      |
|             | gg         | gt   | tg   | gg      | gt   | tg   | gg      | gt   | tg   | gg           | gt   | tg   | gg      | gt   | tg   | gg      | gt   | tg   |
| H1-H2       | 5.54       | 5.59 | 5.55 | 1.94    | 1.69 | 1.17 | 0.04    | 0.02 | 0.20 | 6.11         | 6.24 | 5.77 | 1.07    | 1.66 | 1.19 | 0.16    | 0.08 | 0.02 |
| H2-H3       | 7.69       | 7.68 | 7.92 | 2.41    | 2.32 | 1.91 | 2.64    | 2.59 | 6.54 | 7.44         | 7.41 | 8.02 | 1.77    | 2.56 | 1.94 | 2.18    | 2.63 | 4.34 |
| H2-H8       | 0.82       | 0.94 | 0.93 | 6.45    | 6.80 | 7.31 | 2.07    | 2.80 | 6.84 | 7.62         | 7.57 | 7.50 | 6.72    | 6.08 | 7.34 | 2.58    | 2.98 | 8.29 |
| H3-H4       | 6.13       | 5.89 | 5.73 | 2.16    | 2.65 | 2.41 | 6.95    | 6.89 | 7.01 | 6.19         | 5.96 | 5.75 | 2.37    | 2.80 | 2.42 | 6.93    | 6.97 | 7.25 |
| H4-H5       | 6.42       | 6.69 | 6.15 | 0.10    | 0.69 | 1.22 | 6.64    | 6.80 | 4.70 | 6.58         | 6.82 | 6.26 | 0.97    | 0.36 | 1.23 | 7.26    | 6.80 | 5.18 |
| H5-H6       | 1.03       | 6.70 | 7.07 | 3.56    | 8.48 | 3.77 | 2.86    | 2.52 | 4.33 | 2.29         | 6.66 | 7.13 | 2.43    | 8.12 | 3.80 | 1.55    | 2.68 | 4.19 |
| H5-H7       | 2.51       | 2.56 | 4.12 | 1.22    | 6.09 | 7.83 | 1.15    | 7.21 | 7.85 | 1.77         | 2.42 | 4.09 | 1.67    | 2.85 | 7.85 | 2.00    | 7.36 | 7.71 |
| Atomic pair | GlcNAc(4S) |      |      |         |      |      |         |      |      | M-GlcNAc(4S) |      |      |         |      |      |         |      |      |
|             | $^4C_1$    |      |      | $^1C_4$ |      |      | $^2S_0$ |      |      | $^4C_1$      |      |      | $^1C_4$ |      |      | $^2S_0$ |      |      |
|             | gg         | gt   | tg   | gg      | gt   | tg   | gg      | gt   | tg   | gg           | gt   | tg   | gg      | gt   | tg   | gg      | gt   | tg   |
| H1-H2       | 5.59       | 5.67 | 5.15 | 1.81    | 1.62 | 1.62 | 3.18    | 0.57 | 1.39 | 6.25         | 5.95 | 5.98 | 1.17    | 1.51 | 1.67 | 0.10    | 0.03 | 0.01 |
| H2-H3       | 8.18       | 8.13 | 8.25 | 2.45    | 2.29 | 2.48 | 8.69    | 2.52 | 7.79 | 7.88         | 8.03 | 6.22 | 2.19    | 2.49 | 2.54 | 5.46    | 4.42 | 4.68 |
| H2-H8       | 0.83       | 0.99 | 4.44 | 1.77    | 6.63 | 6.32 | 0.17    | 2.90 | 0.19 | 7.98         | 8.48 | 0.13 | 2.24    | 6.36 | 6.26 | 2.32    | 2.77 | 2.22 |
| H3-H4       | 7.22       | 6.93 | 7.21 | 2.42    | 3.21 | 3.27 | 5.69    | 6.70 | 7.50 | 7.29         | 6.96 | 6.53 | 2.68    | 3.56 | 3.32 | 7.80    | 7.41 | 7.74 |
| H4-H5       | 7.32       | 7.48 | 6.81 | 0.31    | 1.12 | 1.13 | 1.65    | 6.89 | 4.71 | 7.49         | 7.59 | 7.40 | 0.59    | 1.00 | 1.13 | 7.10    | 6.26 | 5.88 |
| H5-H6       | 1.19       | 6.96 | 6.73 | 3.71    | 6.28 | 8.26 | 1.94    | 2.53 | 7.56 | 2.46         | 7.04 | 6.13 | 2.15    | 2.77 | 8.29 | 1.27    | 2.76 | 7.50 |
| H5-H7       | 2.71       | 2.91 | 3.33 | 1.40    | 8.86 | 3.21 | 2.07    | 7.15 | 2.28 | 1.90         | 2.91 | 1.91 | 2.66    | 8.30 | 3.25 | 2.86    | 7.39 | 2.39 |

Supplementary Table 14.  $^3J_{H-H}$  (Hz) calculated by GIAO approach (B3LYP/6-311++G(2d,p)) for GlcNAc(6S) and GlcNAc(46S)

| Atomic pair | GlcNAc(6S)  |      |      |         |      |      |         |      |      | M-GlcNAc(6S)  |      |      |         |      |      |         |      |      |
|-------------|-------------|------|------|---------|------|------|---------|------|------|---------------|------|------|---------|------|------|---------|------|------|
|             | $^4C_1$     |      |      | $^1C_4$ |      |      | $^2S_0$ |      |      | $^4C_1$       |      |      | $^1C_4$ |      |      | $^2S_0$ |      |      |
|             | gg          | gt   | tg   | gg      | gt   | tg   | gg      | gt   | tg   | gg            | gt   | tg   | gg      | gt   | tg   | gg      | gt   | tg   |
| H1-H2       | 5.14        | 5.74 | 5.52 | 1.98    | 1.58 | 1.08 | 3.01    | 0.13 | 2.00 | 6.36          | 6.08 | 5.99 | 1.84    | 1.59 | 1.11 | 2.27    | 0.14 | 0.01 |
| H2-H3       | 7.61        | 7.42 | 8.08 | 2.58    | 2.59 | 2.05 | 8.99    | 3.42 | 8.41 | 7.37          | 7.84 | 6.07 | 2.62    | 2.56 | 2.08 | 0.74    | 2.64 | 4.63 |
| H2-H8       | 0.05        | 0.16 | 1.11 | 6.92    | 7.11 | 7.17 | 0.47    | 2.04 | 0.21 | 7.21          | 4.23 | 0.02 | 6.79    | 6.48 | 7.17 | 5.78    | 2.88 | 8.49 |
| H3-H4       | 6.85        | 6.07 | 6.13 | 2.37    | 2.93 | 2.82 | 4.72    | 6.95 | 6.51 | 6.53          | 5.92 | 6.10 | 2.50    | 2.97 | 2.84 | 3.11    | 6.93 | 7.48 |
| H4-H5       | 6.62        | 7.41 | 6.44 | 0.23    | 0.59 | 1.54 | 0.57    | 5.97 | 2.44 | 6.86          | 7.42 | 6.76 | 0.34    | 0.59 | 1.54 | 7.90    | 7.17 | 5.16 |
| H5-H6       | 2.88        | 4.60 | 7.73 | 2.06    | 2.15 | 8.51 | 0.62    | 8.32 | 2.36 | 1.17          | 5.65 | 5.51 | 1.51    | 1.92 | 8.51 | 2.66    | 6.54 | 2.38 |
| H5-H7       | 1.31        | 0.54 | 4.39 | 2.37    | 7.84 | 3.99 | 5.00    | 3.33 | 7.78 | 3.10          | 1.06 | 5.47 | 3.11    | 7.68 | 4.04 | 1.79    | 1.31 | 7.88 |
| Atomic pair | GlcNAc(46S) |      |      |         |      |      |         |      |      | M-GlcNAc(46S) |      |      |         |      |      |         |      |      |
|             | $^4C_1$     |      |      | $^1C_4$ |      |      | $^2S_0$ |      |      | $^4C_1$       |      |      | $^1C_4$ |      |      | $^2S_0$ |      |      |
|             | gg          | gt   | tg   | gg      | gt   | tg   | gg      | gt   | tg   | gg            | gt   | tg   | gg      | gt   | tg   | gg      | gt   | tg   |
| H1-H2       | 5.14        | 5.85 | 5.76 | 1.95    | 1.73 | 1.32 | 3.13    | 4.64 | 4.50 | 6.74          | 6.67 | 6.46 | 1.87    | 1.69 | 1.33 | 5.05    | 4.72 | 0.74 |
| H2-H3       | 7.85        | 8.03 | 8.09 | 2.61    | 3.37 | 2.35 | 8.55    | 9.02 | 9.08 | 8.05          | 8.00 | 7.65 | 2.62    | 3.35 | 2.37 | 8.99    | 9.07 | 6.93 |
| H2-H8       | 0.14        | 0.10 | 0.58 | 7.13    | 3.86 | 0.25 | 0.92    | 8.57 | 0.07 | 4.88          | 5.74 | 6.96 | 6.40    | 4.04 | 0.29 | 6.23    | 8.70 | 0.16 |
| H3-H4       | 7.27        | 6.74 | 5.60 | 2.36    | 3.30 | 3.23 | 2.82    | 5.06 | 5.05 | 7.22          | 6.71 | 6.16 | 2.90    | 3.33 | 3.24 | 4.58    | 5.11 | 7.62 |
| H4-H5       | 7.48        | 7.88 | 6.54 | 0.46    | 0.68 | 1.93 | 1.03    | 1.10 | 0.58 | 8.16          | 7.94 | 6.98 | 0.79    | 0.70 | 1.94 | 0.88    | 1.16 | 4.72 |
| H5-H6       | 3.40        | 3.05 | 7.82 | 3.48    | 2.57 | 9.21 | 0.58    | 8.94 | 0.58 | 1.13          | 2.71 | 7.56 | 1.49    | 2.69 | 9.23 | 0.73    | 8.90 | 4.67 |
| H5-H7       | 1.09        | 8.06 | 3.50 | 1.91    | 8.61 | 4.61 | 6.21    | 2.66 | 3.10 | 4.03          | 7.72 | 2.87 | 3.38    | 8.97 | 4.65 | 4.61    | 2.65 | 8.43 |

Supplementary Table 15.  ${}^3J_{\text{H-H}}$  (Hz) calculated by GIAO approach (B3LYP/6-311++G(2d,p)) for GlcNAc and GalNAc(4S)

| Atomic pair | GalNAc           |      |      |                  |      |      |                  |      |      | M-GalNAc         |      |      |                  |      |      |                  |      |      |
|-------------|------------------|------|------|------------------|------|------|------------------|------|------|------------------|------|------|------------------|------|------|------------------|------|------|
|             | ${}^4\text{C}_1$ |      |      | ${}^1\text{C}_4$ |      |      | ${}^2\text{S}_0$ |      |      | ${}^4\text{C}_1$ |      |      | ${}^1\text{C}_4$ |      |      | ${}^2\text{S}_0$ |      |      |
|             | gg               | gt   | tg   | gg               | gt   | tg   | gg               | gt   | tg   | gg               | gt   | tg   | gg               | gt   | tg   | gg               | gt   | tg   |
| H1-H2       | 5.68             | 5.70 | 5.53 | 1.99             | 1.46 | 1.17 | 2.75             | 3.37 | 2.03 | 5.73             | 5.33 | 6.19 | 1.29             | 1.46 | 1.27 | 5.14             | 0.14 | 0.15 |
| H2-H3       | 7.52             | 7.66 | 7.87 | 3.07             | 2.94 | 3.14 | 8.22             | 8.42 | 8.04 | 7.82             | 7.54 | 7.84 | 3.07             | 3.21 | 3.16 | 8.74             | 4.32 | 4.29 |
| H2-H8       | 0.86             | 1.08 | 0.88 | 6.44             | 7.17 | 8.81 | 0.17             | 0.10 | 7.27 | 1.58             | 1.10 | 8.20 | 7.37             | 7.11 | 9.15 | 3.06             | 3.73 | 3.61 |
| H3-H4       | 3.14             | 3.08 | 3.90 | 4.56             | 3.70 | 2.61 | 3.95             | 4.94 | 3.57 | 2.61             | 3.22 | 3.72 | 3.95             | 3.45 | 2.57 | 4.74             | 2.94 | 3.31 |
| H4-H5       | 1.91             | 1.49 | 2.08 | 7.28             | 6.07 | 5.23 | 7.31             | 6.55 | 6.51 | 1.43             | 1.23 | 1.88 | 6.88             | 6.49 | 5.23 | 7.31             | 5.14 | 5.50 |
| H5-H6       | 1.00             | 6.96 | 6.40 | 3.13             | 8.19 | 3.74 | 1.65             | 8.32 | 4.45 | 1.25             | 5.87 | 6.49 | 1.77             | 8.43 | 3.95 | 3.02             | 7.16 | 5.26 |
| H5-H7       | 2.81             | 2.60 | 5.65 | 1.43             | 6.30 | 8.37 | 2.08             | 4.39 | 7.88 | 2.64             | 1.23 | 5.49 | 2.78             | 3.23 | 8.41 | 1.10             | 2.68 | 7.78 |
| Atomic pair | GalNAc(4S)       |      |      |                  |      |      |                  |      |      | M-GalNAc(4S)     |      |      |                  |      |      |                  |      |      |
|             | ${}^4\text{C}_1$ |      |      | ${}^1\text{C}_4$ |      |      | ${}^2\text{S}_0$ |      |      | ${}^4\text{C}_1$ |      |      | ${}^1\text{C}_4$ |      |      | ${}^2\text{S}_0$ |      |      |
|             | gg               | gt   | tg   | gg               | gt   | tg   | gg               | gt   | tg   | gg               | gt   | tg   | gg               | gt   | tg   | gg               | gt   | tg   |
| H1-H2       | 4.78             | 5.49 | 5.27 | 1.11             | 0.82 | 1.10 | 2.92             | 2.05 | 2.81 | 6.13             | 5.54 | 5.79 | 1.34             | 0.75 | 1.10 | 0.60             | 0.76 | 3.02 |
| H2-H3       | 7.24             | 8.06 | 8.50 | 2.82             | 2.55 | 2.06 | 8.48             | 8.16 | 8.23 | 7.81             | 8.23 | 8.21 | 2.56             | 2.82 | 2.06 | 7.22             | 7.58 | 8.25 |
| H2-H8       | 0.47             | 0.58 | 6.61 | 5.90             | 7.60 | 4.05 | 0.39             | 4.37 | 7.32 | 7.00             | 6.81 | 7.07 | 8.16             | 7.86 | 4.22 | 0.12             | 0.09 | 7.69 |
| H3-H4       | 2.74             | 2.71 | 3.71 | 3.81             | 3.43 | 3.70 | 2.95             | 0.89 | 1.34 | 2.98             | 3.57 | 3.68 | 4.89             | 3.08 | 3.68 | 1.50             | 2.02 | 1.41 |
| H4-H5       | 0.83             | 1.92 | 2.85 | 6.40             | 5.46 | 5.63 | 7.12             | 3.80 | 4.08 | 0.98             | 2.48 | 2.89 | 6.63             | 5.75 | 5.58 | 4.41             | 5.70 | 4.13 |
| H5-H6       | 1.56             | 2.71 | 6.84 | 2.66             | 8.55 | 6.09 | 3.03             | 1.48 | 7.42 | 1.65             | 2.49 | 6.83 | 1.01             | 7.79 | 6.03 | 4.69             | 2.69 | 7.51 |
| H5-H7       | 2.88             | 6.74 | 4.90 | 1.93             | 5.13 | 1.20 | 1.35             | 6.01 | 5.11 | 2.88             | 6.55 | 4.93 | 3.80             | 2.67 | 1.15 | 0.38             | 7.03 | 5.13 |

Supplementary Table 16.  $^3J_{\text{H-H}}$  (Hz) calculated by GIAO approach (B3LYP/6-311++G(2d,p)) for GlcNAc(6S) and GlcNAc(46S)

| Atomic pair | GalNAc(6S)     |      |      |                |      |      |                |      |      | M-GalNAc(6S)   |      |      |                |      |      |                |      |      |
|-------------|----------------|------|------|----------------|------|------|----------------|------|------|----------------|------|------|----------------|------|------|----------------|------|------|
|             | $^4\text{C}_1$ |      |      | $^1\text{C}_4$ |      |      | $^2\text{S}_0$ |      |      | $^4\text{C}_1$ |      |      | $^1\text{C}_4$ |      |      | $^2\text{S}_0$ |      |      |
|             | gg             | gt   | tg   | gg             | gt   | tg   | gg             | gt   | tg   | gg             | gt   | tg   | gg             | gt   | tg   | gg             | gt   | tg   |
| H1-H2       | 5.24           | 5.82 | 5.63 | 1.13           | 1.55 | 0.86 | 3.88           | 3.02 | 2.55 | 6.31           | 6.93 | 6.29 | 1.36           | 1.47 | 0.93 | 5.57           | 5.83 | 0.78 |
| H2-H3       | 7.23           | 7.33 | 7.69 | 3.44           | 3.25 | 3.31 | 7.46           | 8.05 | 8.10 | 7.16           | 7.18 | 7.62 | 3.16           | 3.22 | 3.32 | 7.46           | 8.48 | 7.00 |
| H2-H8       | 0.08           | 0.22 | 0.83 | 5.97           | 6.66 | 6.80 | 0.65           | 3.60 | 0.20 | 7.87           | 7.14 | 7.89 | 8.08           | 7.73 | 7.00 | 8.14           | 3.39 | 0.13 |
| H3-H4       | 2.86           | 3.15 | 3.73 | 3.75           | 3.58 | 2.37 | 6.98           | 3.77 | 3.90 | 2.67           | 3.19 | 3.61 | 3.72           | 3.31 | 2.39 | 6.96           | 5.63 | 3.19 |
| H4-H5       | 1.78           | 1.79 | 1.94 | 6.59           | 6.88 | 4.99 | 6.33           | 7.02 | 6.30 | 1.38           | 1.66 | 1.81 | 6.93           | 6.73 | 5.03 | 6.40           | 6.89 | 5.46 |
| H5-H6       | 1.93           | 4.67 | 7.89 | 2.07           | 2.47 | 8.39 | 1.13           | 9.06 | 2.22 | 1.47           | 3.06 | 7.88 | 1.98           | 2.06 | 8.41 | 1.12           | 9.55 | 3.09 |
| H5-H7       | 2.35           | 0.64 | 4.14 | 2.50           | 8.19 | 3.37 | 4.39           | 3.87 | 7.52 | 2.94           | 0.27 | 4.18 | 2.86           | 7.88 | 3.40 | 4.41           | 5.48 | 8.26 |
| Atomic pair | GalNAc(46S)    |      |      |                |      |      |                |      |      | M-GalNAc(46S)  |      |      |                |      |      |                |      |      |
|             | $^4\text{C}_1$ |      |      | $^1\text{C}_4$ |      |      | $^2\text{S}_0$ |      |      | $^4\text{C}_1$ |      |      | $^1\text{C}_4$ |      |      | $^2\text{S}_0$ |      |      |
|             | gg             | gt   | tg   | gg             | gt   | tg   | gg             | gt   | tg   | gg             | gt   | tg   | gg             | gt   | tg   | gg             | gt   | tg   |
| H1-H2       | 5.38           | 5.49 | 5.39 | 1.31           | 1.60 | 1.37 | 4.96           | 5.65 | 0.63 | 6.35           | 6.23 | 6.07 | 1.55           | 1.48 | 1.43 | 7.09           | 4.04 | 1.61 |
| H2-H3       | 7.57           | 7.99 | 8.43 | 2.47           | 3.35 | 3.55 | 8.19           | 8.45 | 8.07 | 7.36           | 8.02 | 8.40 | 3.79           | 3.47 | 3.65 | 7.32           | 8.56 | 7.84 |
| H2-H8       | 0.14           | 0.21 | 0.64 | 8.94           | 7.25 | 6.05 | 4.17           | 5.24 | 0.38 | 6.32           | 2.50 | 7.14 | 0.77           | 7.91 | 6.06 | 10.48          | 5.82 | 0.02 |
| H3-H4       | 2.90           | 1.70 | 3.36 | 4.76           | 4.00 | 2.89 | 3.00           | 7.28 | 1.40 | 2.87           | 1.72 | 3.34 | 4.26           | 3.56 | 2.86 | 3.15           | 5.49 | 2.97 |
| H4-H5       | 2.21           | 1.58 | 2.97 | 7.59           | 7.19 | 5.95 | 6.93           | 7.42 | 4.95 | 1.84           | 1.39 | 2.81 | 7.08           | 6.90 | 5.95 | 6.43           | 7.79 | 6.96 |
| H5-H6       | 2.26           | 6.63 | 6.23 | 1.86           | 3.58 | 7.97 | 3.94           | 9.16 | 7.09 | 1.71           | 7.47 | 6.14 | 0.94           | 2.94 | 8.12 | 4.13           | 7.30 | 4.45 |
| H5-H7       | 2.53           | 6.20 | 5.98 | 3.42           | 9.18 | 2.23 | 1.04           | 3.80 | 7.08 | 3.12           | 5.84 | 5.90 | 4.46           | 8.82 | 2.37 | 0.93           | 2.19 | 8.37 |



Supplementary Table 17.  $^3J_{H-H}$  (Hz) calculated by GIAO approach (B3LYP/6-311++G(2d,p)) for GlcUA and IdoUA derivatives

| Atomic pair | GlcUA      |         |         | M-GlcUA      |         |         | IdoUA      |         |         | M-IdoUA      |         |         |
|-------------|------------|---------|---------|--------------|---------|---------|------------|---------|---------|--------------|---------|---------|
|             | $^4C_1$    | $^1C_4$ | $^2S_0$ | $^4C_1$      | $^1C_4$ | $^2S_0$ | $^4C_1$    | $^1C_4$ | $^2S_0$ | $^4C_1$      | $^1C_4$ | $^2S_0$ |
| H1-H2       | 4.81       | 1.69    | 4.26    | 5.45         | 0.47    | 3.30    | 5.01       | 1.08    | 2.94    | 5.14         | 1.17    | 3.04    |
| H2-H3       | 6.25       | 2.87    | 8.01    | 6.32         | 2.36    | 7.57    | 6.12       | 2.23    | 7.62    | 6.20         | 2.26    | 7.67    |
| H3-H4       | 6.00       | 3.01    | 3.85    | 5.97         | 3.67    | 4.16    | 7.03       | 3.01    | 2.51    | 7.11         | 2.94    | 2.51    |
| H4-H5       | 6.94       | 1.10    | 0.29    | 6.96         | 2.36    | 0.04    | 5.64       | 1.38    | 3.24    | 5.54         | 1.42    | 3.32    |
| Atomic pair | GlcUA(2S)  |         |         | M-GlcUA(2S)  |         |         | IdoUA(2S)  |         |         | M-IdoUA(2S)  |         |         |
|             | $^4C_1$    | $^1C_4$ | $^2S_0$ | $^4C_1$      | $^1C_4$ | $^2S_0$ | $^4C_1$    | $^1C_4$ | $^2S_0$ | $^4C_1$      | $^1C_4$ | $^2S_0$ |
| H1-H2       | 4.82       | 0.82    | 3.46    | 5.22         | 1.69    | 4.05    | 5.61       | 1.12    | 2.94    | 5.24         | 1.70    | 3.01    |
| H2-H3       | 7.00       | 2.66    | 8.00    | 6.64         | 3.13    | 8.86    | 7.44       | 2.17    | 7.60    | 6.38         | 2.87    | 7.55    |
| H3-H4       | 6.40       | 3.68    | 5.43    | 6.55         | 2.99    | 4.67    | 6.91       | 2.40    | 2.61    | 7.23         | 2.91    | 2.87    |
| H4-H5       | 7.08       | 2.69    | 1.02    | 7.08         | 1.84    | 0.16    | 5.70       | 1.75    | 3.12    | 5.48         | 2.13    | 3.40    |
| Atomic pair | GlcUA(3S)  |         |         | M-GlcUA(3S)  |         |         | IdoUA(3S)  |         |         | M-IdoUA(3S)  |         |         |
|             | $^4C_1$    | $^1C_4$ | $^2S_0$ | $^4C_1$      | $^1C_4$ | $^2S_0$ | $^4C_1$    | $^1C_4$ | $^2S_0$ | $^4C_1$      | $^1C_4$ | $^2S_0$ |
| H1-H2       | 5.16       | 0.88    | 4.47    | 5.54         | 0.63    | 3.98    | 3.83       | 1.11    | 2.27    | 4.23         | 1.18    | 2.40    |
| H2-H3       | 5.67       | 2.74    | 8.85    | 5.24         | 2.75    | 8.82    | 7.71       | 2.49    | 7.60    | 7.62         | 2.50    | 7.71    |
| H3-H4       | 5.41       | 3.56    | 2.70    | 5.39         | 3.93    | 4.14    | 8.34       | 3.49    | 3.53    | 8.45         | 3.45    | 3.59    |
| H4-H5       | 7.07       | 2.04    | 0.51    | 7.20         | 1.98    | 0.70    | 4.74       | 1.49    | 3.65    | 4.72         | 1.50    | 3.75    |
| Atomic pair | GlcUA(23S) |         |         | M-GlcUA(23S) |         |         | IdoUA(23S) |         |         | M-IdoUA(23S) |         |         |
|             | $^4C_1$    | $^1C_4$ | $^2S_0$ | $^4C_1$      | $^1C_4$ | $^2S_0$ | $^4C_1$    | $^1C_4$ | $^2S_0$ | $^4C_1$      | $^1C_4$ | $^2S_0$ |
| H1-H2       | 4.99       | 1.06    | 5.59    | 5.55         | 1.05    | 4.54    | 6.04       | 1.55    | 3.32    | 4.82         | 1.53    | 3.66    |
| H2-H3       | 8.06       | 2.73    | 9.42    | 4.97         | 2.87    | 9.30    | 7.72       | 3.08    | 8.85    | 8.74         | 2.44    | 8.37    |
| H3-H4       | 8.08       | 2.90    | 3.01    | 5.46         | 3.02    | 2.70    | 6.89       | 3.17    | 2.37    | 8.23         | 2.57    | 1.93    |
| H4-H5       | 6.48       | 1.44    | 0.54    | 7.43         | 1.29    | 0.42    | 6.24       | 3.43    | 3.32    | 4.99         | 3.55    | 3.16    |

Supplementary Table 18. <sup>1</sup>H chemical shifts (ppm) in CH<sub>3</sub> of the acetyl group of Glc/GalNAc derivatives.

| Monosaccharide | <sup>1</sup> H chemical shifts, ppm | Monosaccharide | <sup>1</sup> H chemical shifts, ppm |
|----------------|-------------------------------------|----------------|-------------------------------------|
| GlcNAc         | 2.047                               | GlcNAc         | 2.063                               |
| GlcNAc(4S)     | 2.048                               | GlcNAc(4S)     | 2.086                               |
| GlcNAc(6S)     | 2.089                               | GlcNAc(6S)     | 2.101                               |
| GlcNAc(46S)    | 2.096                               | GlcNAc(46S)    | 2.104                               |
| M-GlcNAc       | 1.968                               | M-GalNAc       | 1.990                               |
| M-GlcNAc(4S)   | 1.994                               | M-GalNAc(4S)   | 2.062                               |
| M-GlcNAc(6S)   | 2.071                               | M-GalNAc(6S)   | 2.038                               |
| M-GlcNAc(46S)  | 2.031                               | M-GalNAc(46S)  | 2.043                               |

Chemical shifts presented are mean values for all gg/gt/tg conformations of the monosaccharide in <sup>4</sup>C<sub>1</sub> ring conformation.

Supplementary Table 19. <sup>1</sup>H chemical shifts (ppm) in CH<sub>3</sub> of the acetyl group of Glc/GalNAc derivatives for gg/gt/tg conformations

| Molekule    | Proton | ppm, gg | ppm, gt | ppm, tg |
|-------------|--------|---------|---------|---------|
| GlcNAc      | H9     | 1.70    | 1.69    | 1.70    |
|             | H10    | 2.21    | 2.22    | 2.21    |
|             | H11    | 2.25    | 2.23    | 2.21    |
| GlcNAc(4S)  | H9     | 1.68    | 1.68    | 1.76    |
|             | H10    | 2.16    | 2.19    | 2.24    |
|             | H11    | 2.21    | 2.21    | 2.30    |
| GlcNAc(6S)  | H9     | 1.77    | 1.76    | 1.67    |
|             | H10    | 2.22    | 2.27    | 2.21    |
|             | H11    | 2.32    | 2.32    | 2.26    |
| GlcNAc(46S) | H9     | 1.81    | 1.82    | 1.73    |
|             | H10    | 2.25    | 2.21    | 2.20    |
|             | H11    | 2.33    | 2.29    | 2.22    |
| GalNAc      | H9     | 1.74    | 1.73    | 1.72    |
|             | H10    | 2.23    | 2.23    | 2.18    |
|             | H11    | 2.24    | 2.26    | 2.24    |
| GalNAc(4S)  | H9     | 1.77    | 1.76    | 1.70    |
|             | H10    | 2.22    | 2.18    | 2.31    |
|             | H11    | 2.32    | 2.20    | 2.31    |
| GalNAc(6S)  | H9     | 1.82    | 1.81    | 1.71    |
|             | H10    | 2.26    | 2.31    | 2.16    |
|             | H11    | 2.32    | 2.32    | 2.20    |
| GalNAc(46S) | H9     | 1.84    | 1.87    | 1.74    |
|             | H10    | 2.21    | 2.20    | 2.19    |
|             | H11    | 2.33    | 2.35    | 2.21    |
| M-GlcNAc    | H9     | 1.53    | 1.54    | 1.49    |

|               |     |      |      |      |
|---------------|-----|------|------|------|
|               | H10 | 2.19 | 2.20 | 2.08 |
|               | H11 | 2.24 | 2.24 | 2.20 |
| M-GlcNAc(4S)  | H9  | 1.56 | 1.48 | 1.75 |
|               | H10 | 2.19 | 2.11 | 2.24 |
|               | H11 | 2.19 | 2.17 | 2.26 |
| M-GlcNAc(6S)  | H9  | 1.64 | 1.72 | 1.72 |
|               | H10 | 2.15 | 2.11 | 2.25 |
|               | H11 | 2.40 | 2.37 | 2.28 |
| M-GlcNAc(46S) | H9  | 1.69 | 1.73 | 1.55 |
|               | H10 | 2.15 | 2.12 | 2.16 |
|               | H11 | 2.26 | 2.36 | 2.26 |
| M-GalNAc      | H9  | 1.60 | 1.57 | 1.55 |
|               | H10 | 2.17 | 2.20 | 2.18 |
|               | H11 | 2.20 | 2.21 | 2.23 |
| M-GalNAc(4S)  | H9  | 1.55 | 1.64 | 1.73 |
|               | H10 | 2.14 | 2.28 | 2.28 |
|               | H11 | 2.29 | 2.29 | 2.36 |
| M-GalNAc(6S)  | H9  | 1.63 | 1.65 | 1.55 |
|               | H10 | 2.18 | 2.21 | 2.13 |
|               | H11 | 2.38 | 2.38 | 2.23 |
| M-GalNAc(46S) | H9  | 1.68 | 1.76 | 1.56 |
|               | H10 | 2.11 | 2.10 | 2.17 |
|               | H11 | 2.43 | 2.36 | 2.22 |

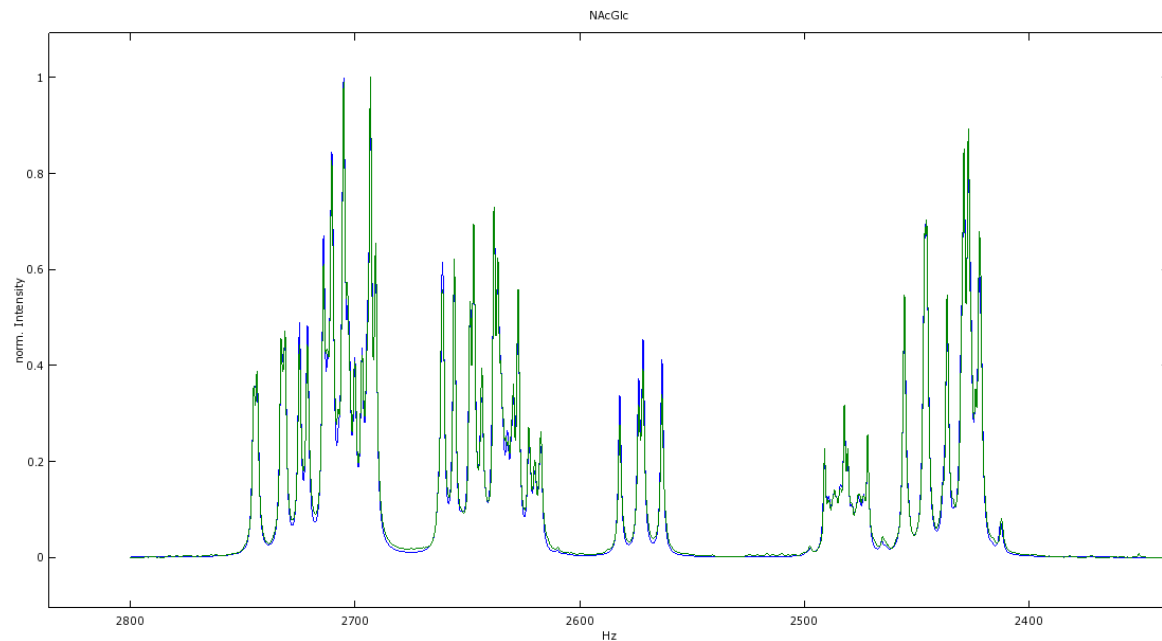

**Supplementary Figure 1.** Comparison of the simulated (blue) and measured NMR spectrum (green) of NAcGlc. The simulated spectra were calculated using a self-written Octave [43] script and simulating the alpha- and beta form by assuming a single line width per molecule. The signal intensities were normalized to the highest sugar peak in the present subpart of the spectrum.

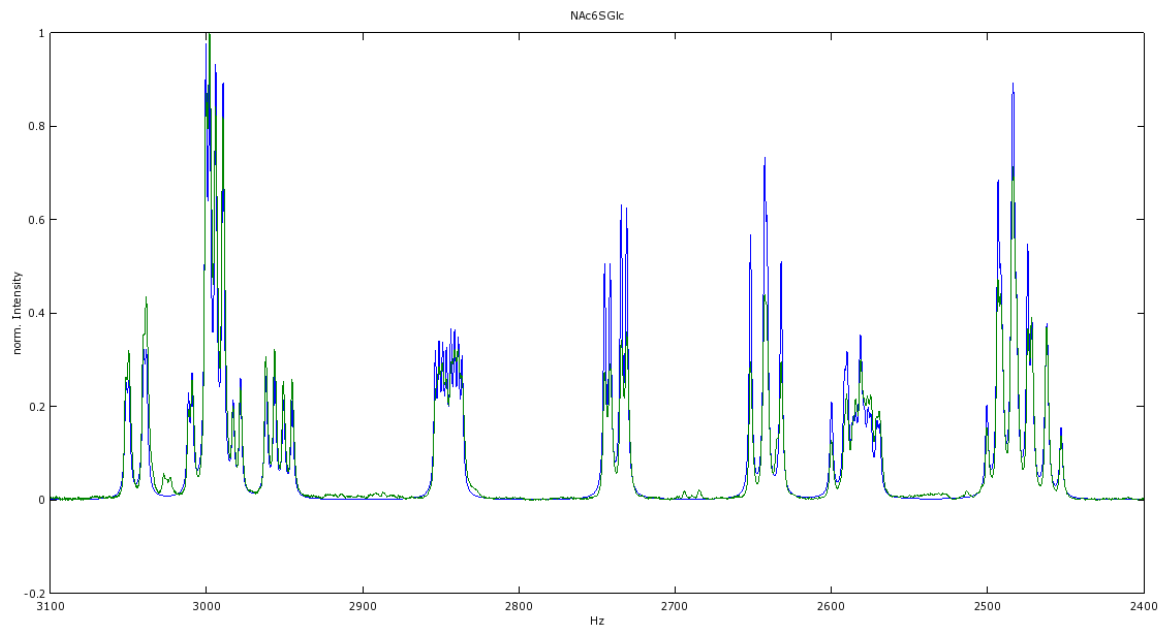

**Supplementary Figure 2.** Comparison of the simulated (blue) and measured NMR spectrum (green) of NAc6SGlc. The simulated spectra were calculated using a self-written Octave [43] script and simulating the alpha- and beta form by assuming a single line width per molecule. The signal intensities were normalized to the highest sugar peak in the present subpart of the spectrum.

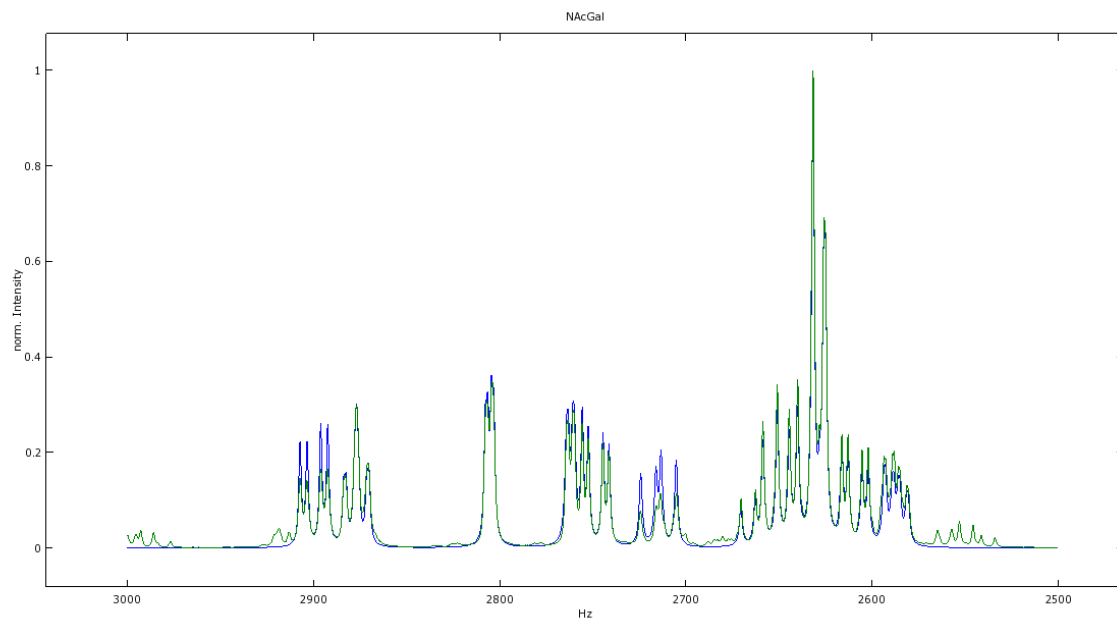

**Supplementary Figure 3.** Comparison of the simulated (blue) and measured NMR spectrum (green) of NAcGal. The simulated spectra were calculated using a self-written Octave [43] script and simulating the alpha- and beta form by assuming a single line width per molecule. The signal intensities were normalized to the highest sugar peak in the present subpart of the spectrum.

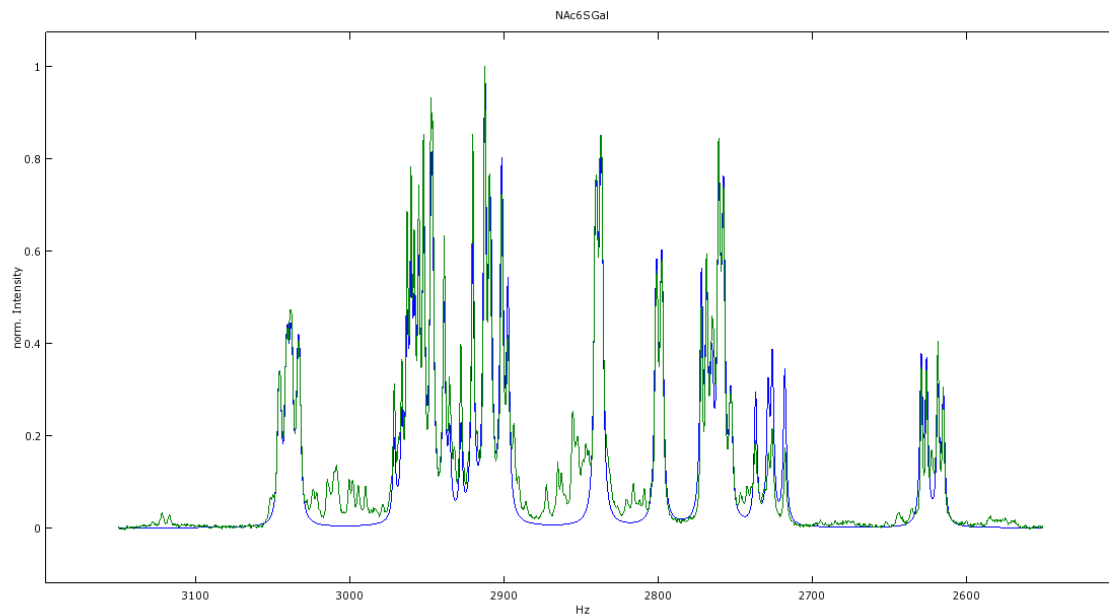

**Supplementary Figure 4.** Comparison of the simulated (blue) and measured NMR spectrum (green) of NAc6SGal. The simulated spectra were calculated using a self-written Octave [43] script and simulating the alpha- and beta form by assuming a single line width per molecule. The signal intensities were normalized to the highest sugar peak in the present subpart of the spectrum.



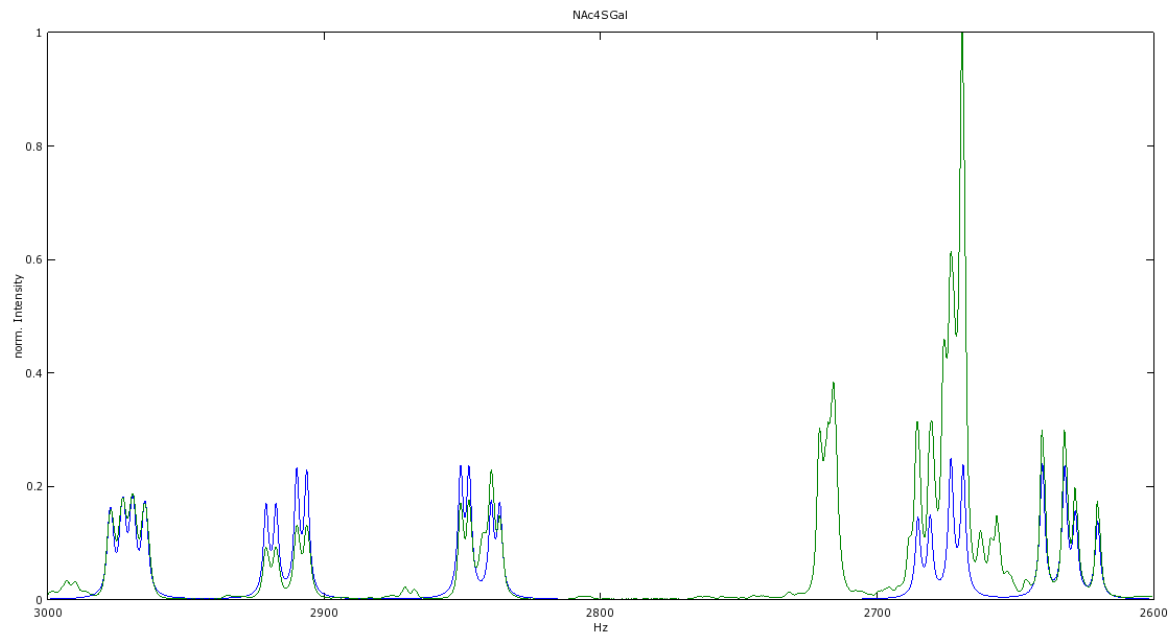

**Supplementary Figure 5.** Comparison of the simulated (blue) and measured NMR spectrum (green) of NAc4SGal. The simulated spectra were calculated using a self-written Octave [43] script and simulating the alpha form only by assuming a single line width per molecule. The signal intensities were normalized to the highest sugar peak in the present subpart of the spectrum.
